# Supplementary material for: A Facile Synthesis of Functionalized Dispirooxindole Derivatives via a Three-Component 1,3-Dipolar Cycloaddition Reaction
Source: Molecules. 2013 May 3;18(5):5142–54. doi: 10.3390/molecules18055142 (PMC6270352; doi:10.3390/molecules18055142)

# Supporting Information

## $^1\text{H}$ , $^{13}\text{C}$ -NMR and HRMS Spectras

Figure S1.  $^1\text{H}$ -NMR of Compound 4a.

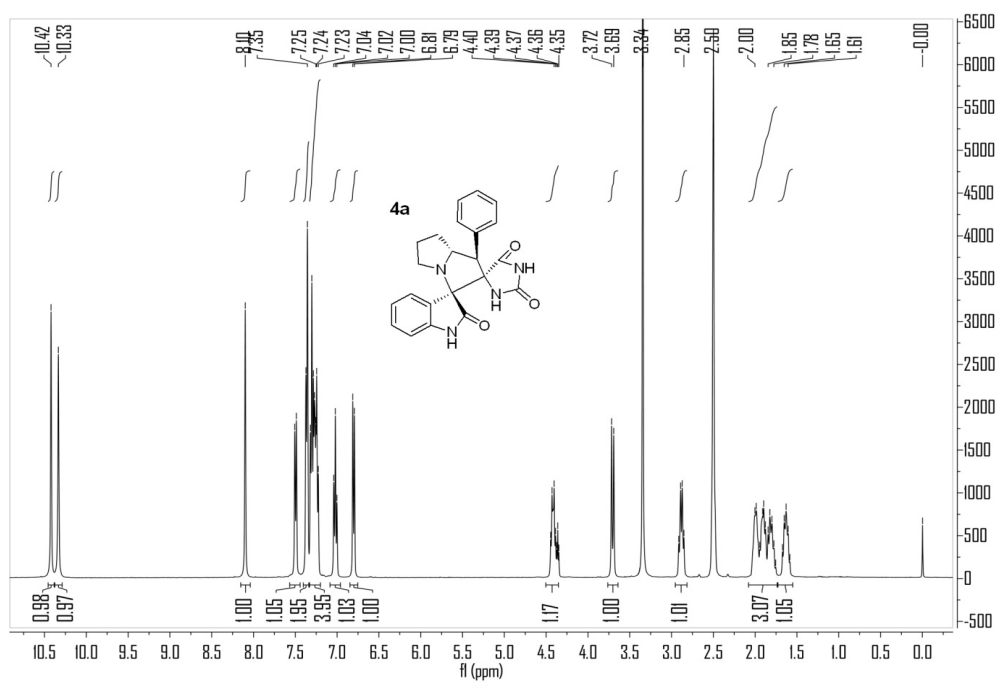

Figure S2.  $^{13}\text{C}$ -NMR of Compound 4a.

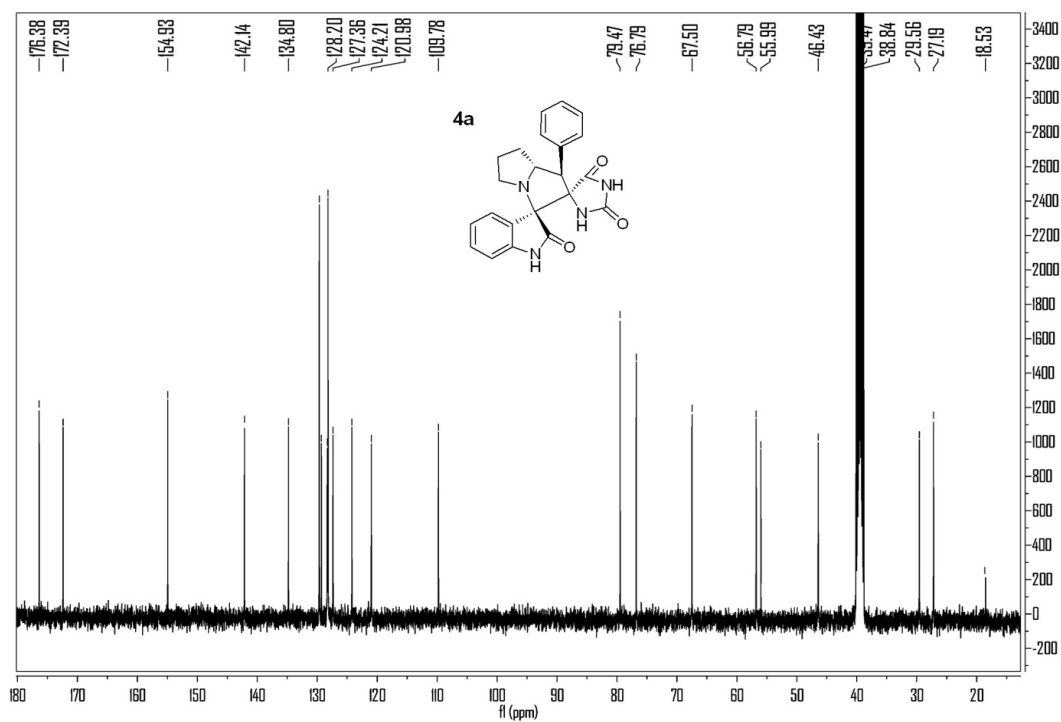

Figure S3. HRMS of Compound 4a.

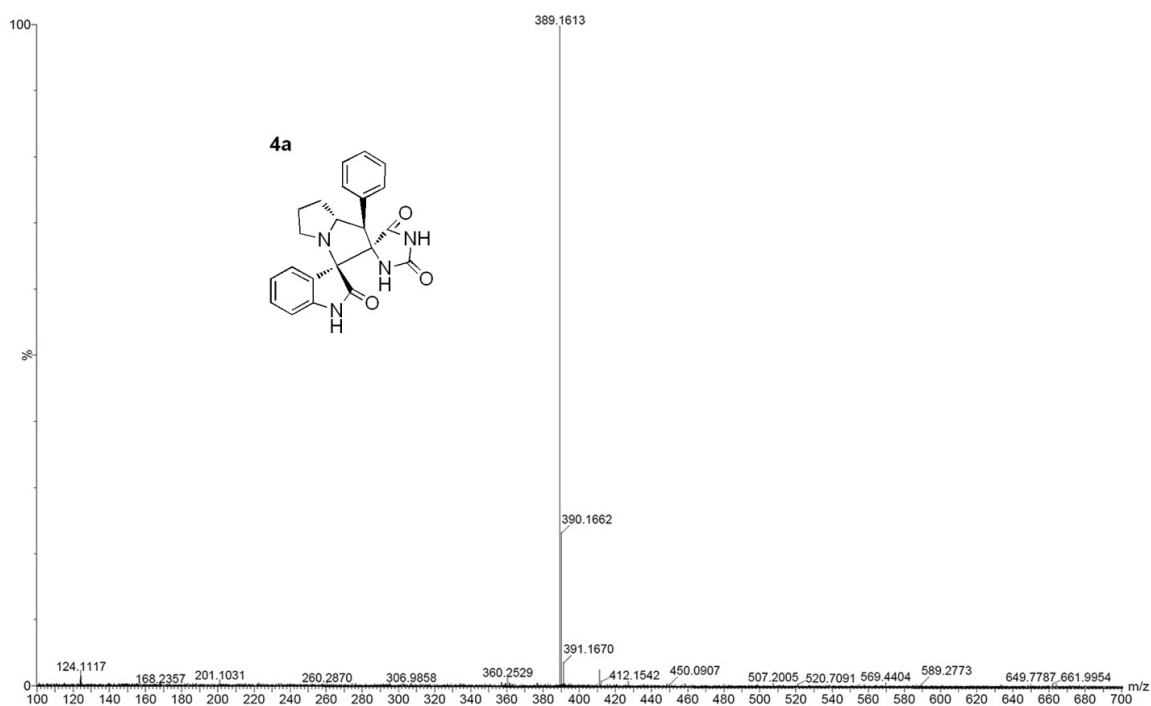Figure S4. <sup>1</sup>H-NMR of Compound 4b.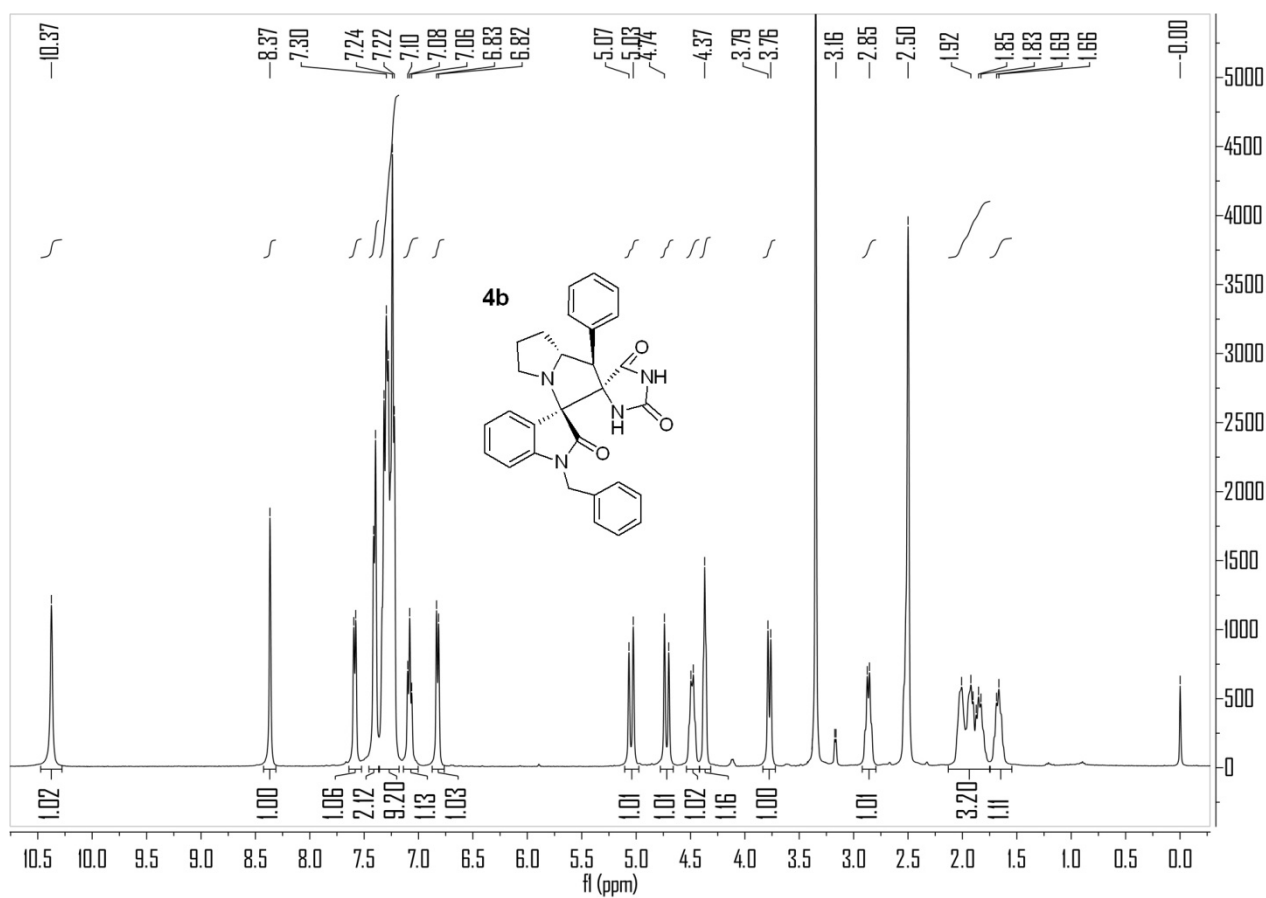

Figure S5.  $^{13}\text{C}$ -NMR of Compound 4b.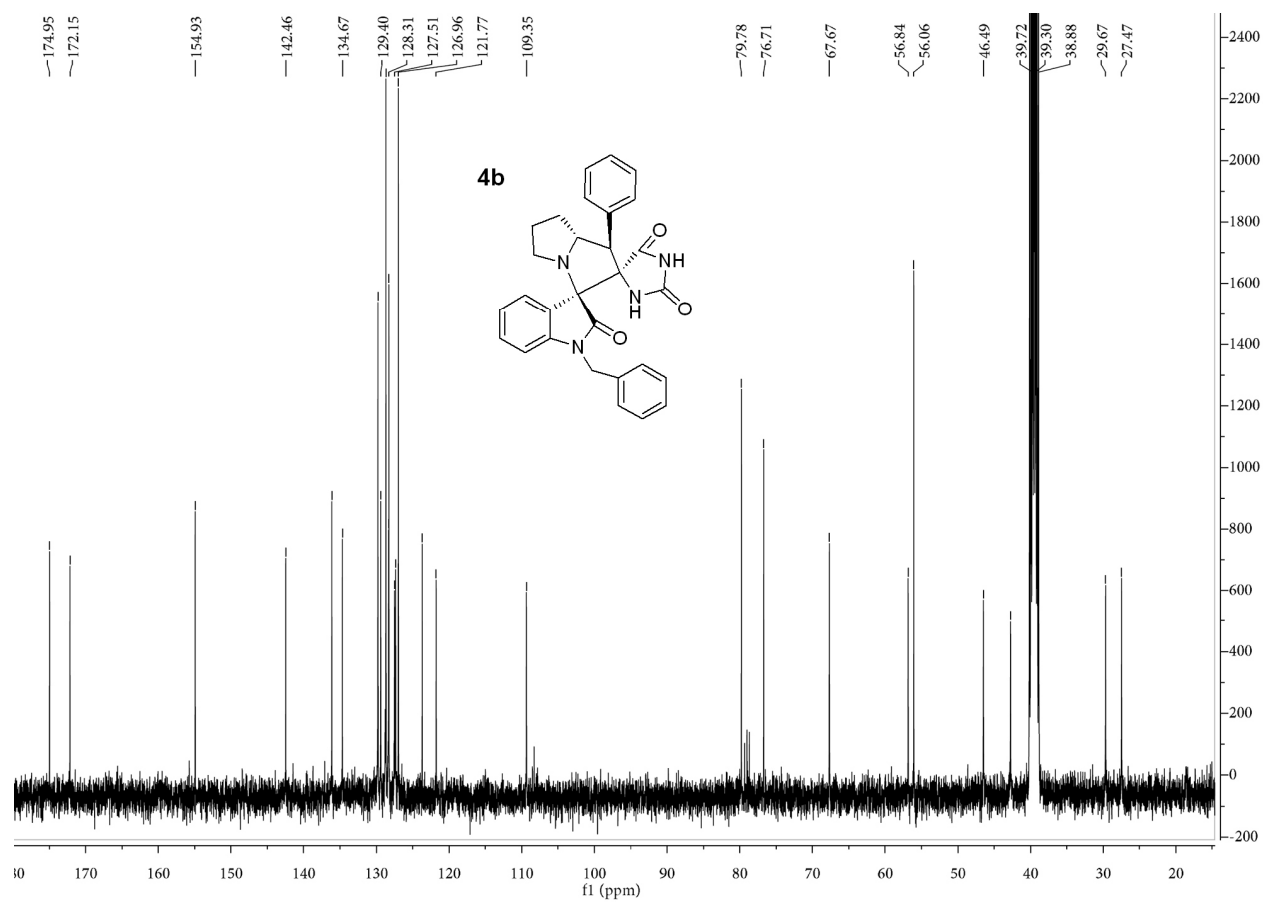

Figure S6. HRMS of Compound 4b.

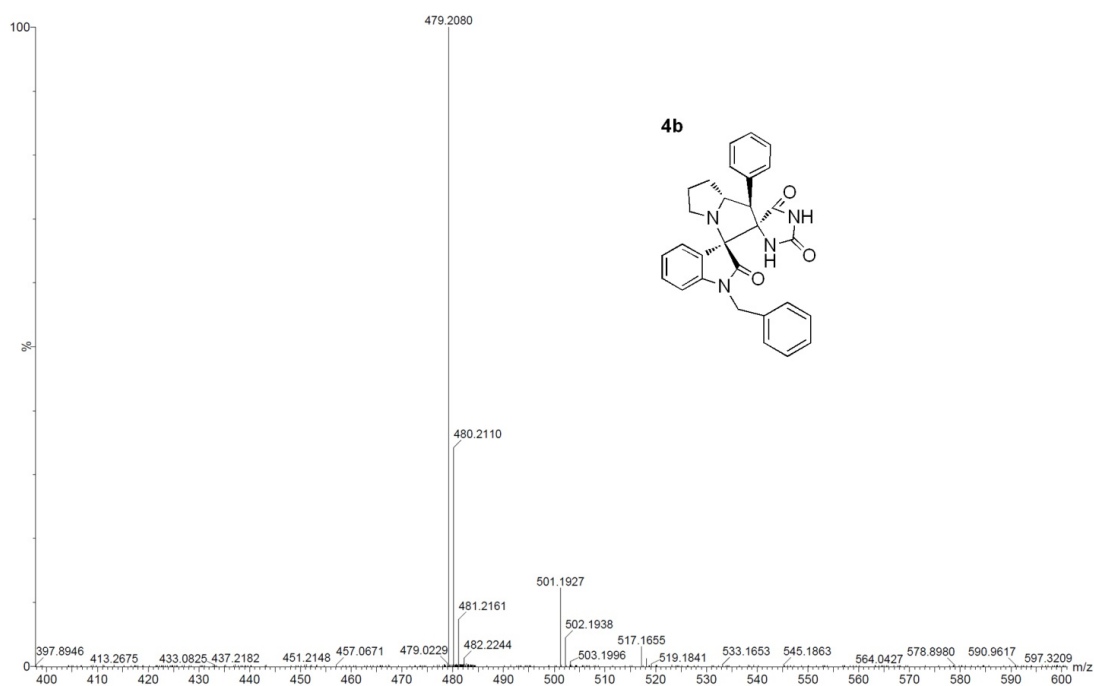

Figure S7.  $^1\text{H}$ -NMR of Compound 4c.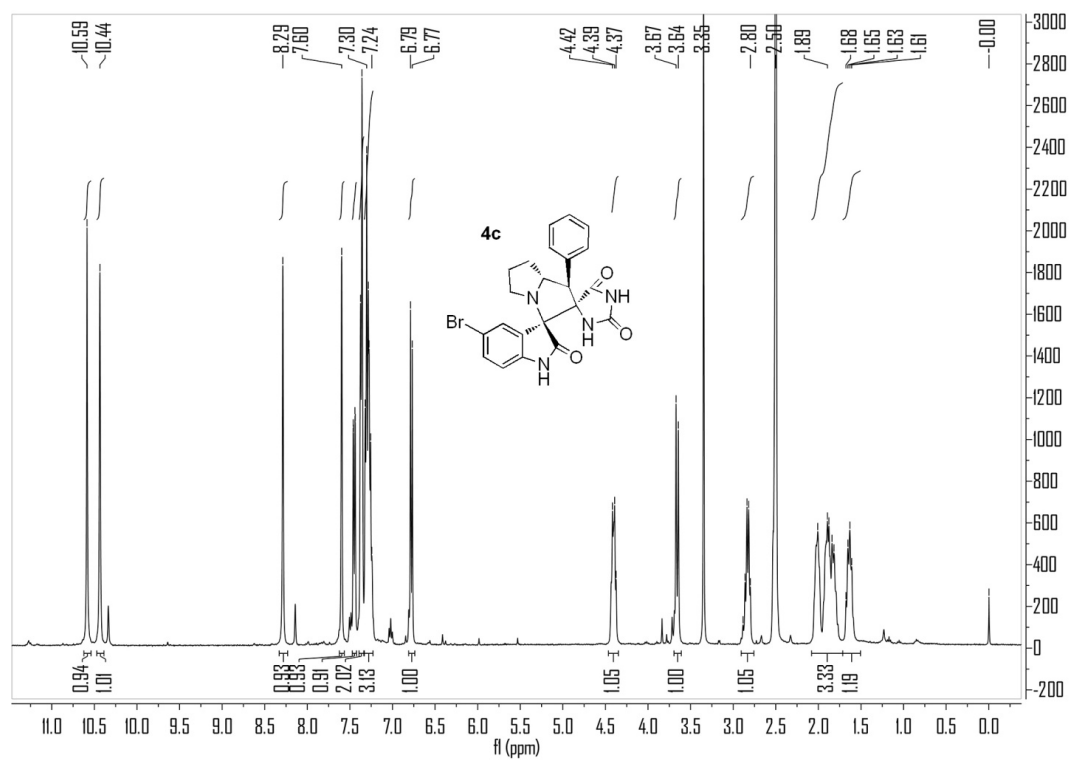Figure S8.  $^{13}\text{C}$ -NMR of Compound 4c.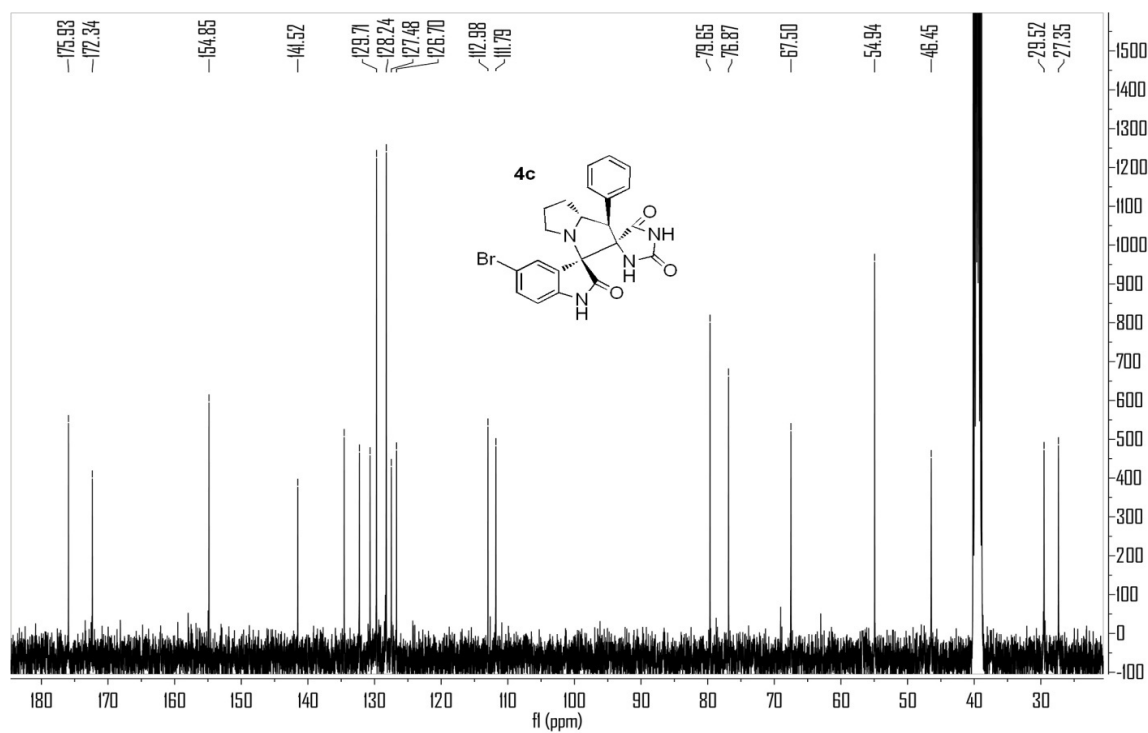

Figure S9. HRMS of Compound 4c.

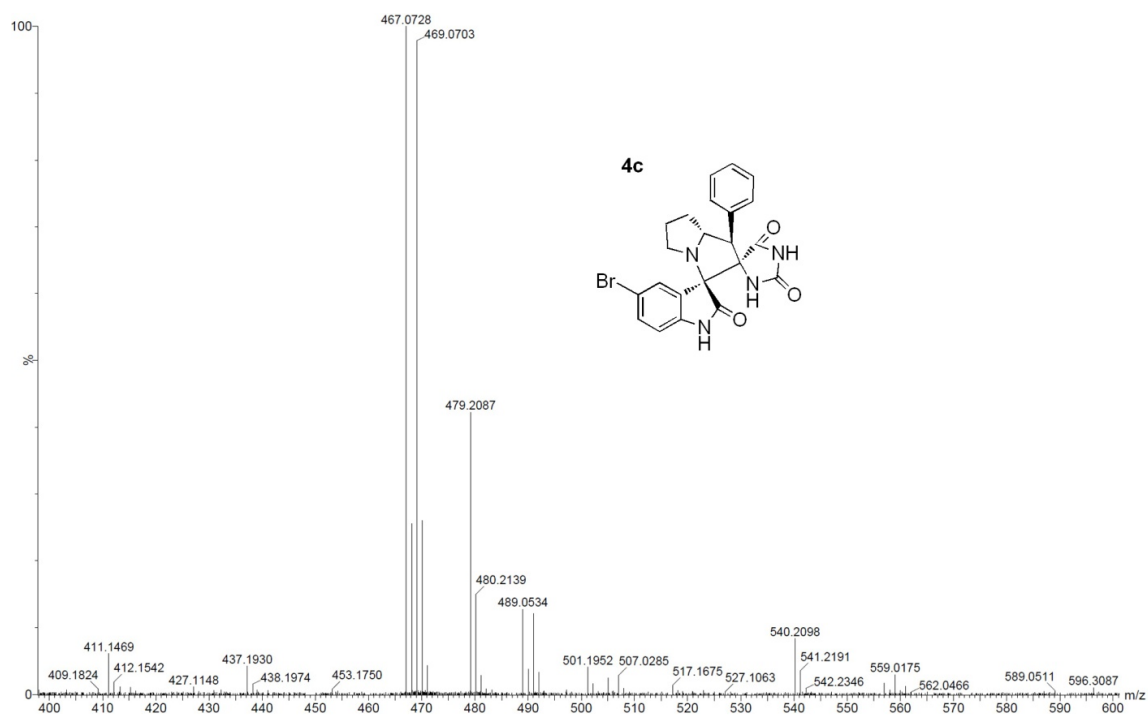Figure S10.  $^1\text{H}$ -NMR of Compound 4d.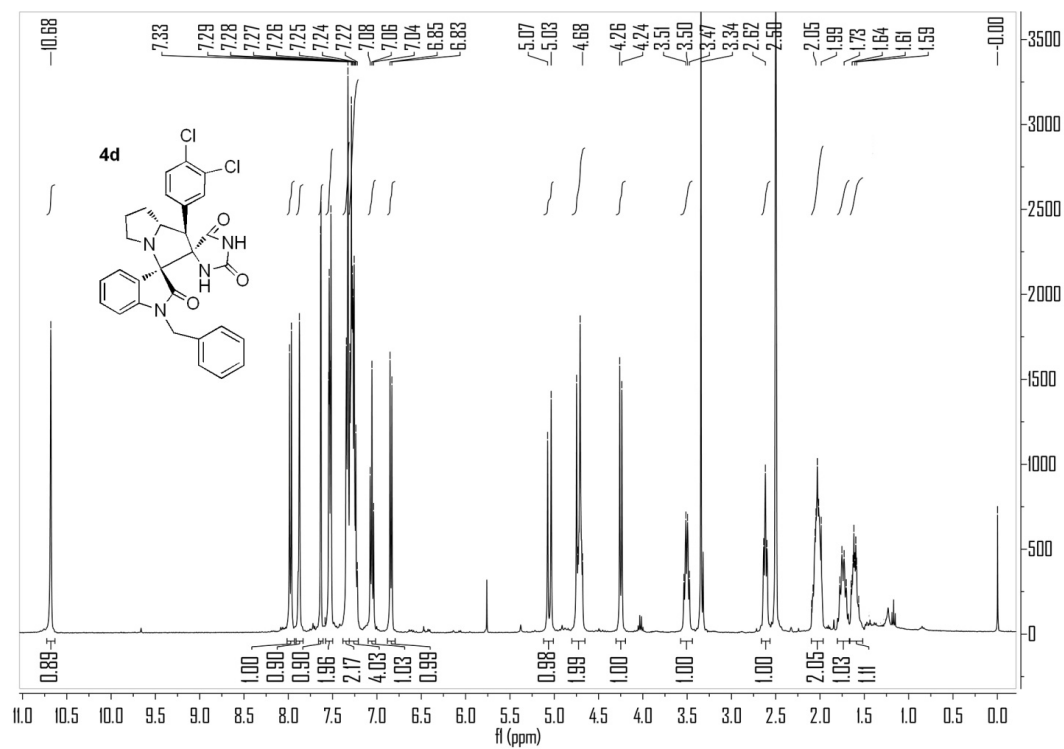

Figure S11.  $^{13}\text{C}$ -NMR of Compound 4d.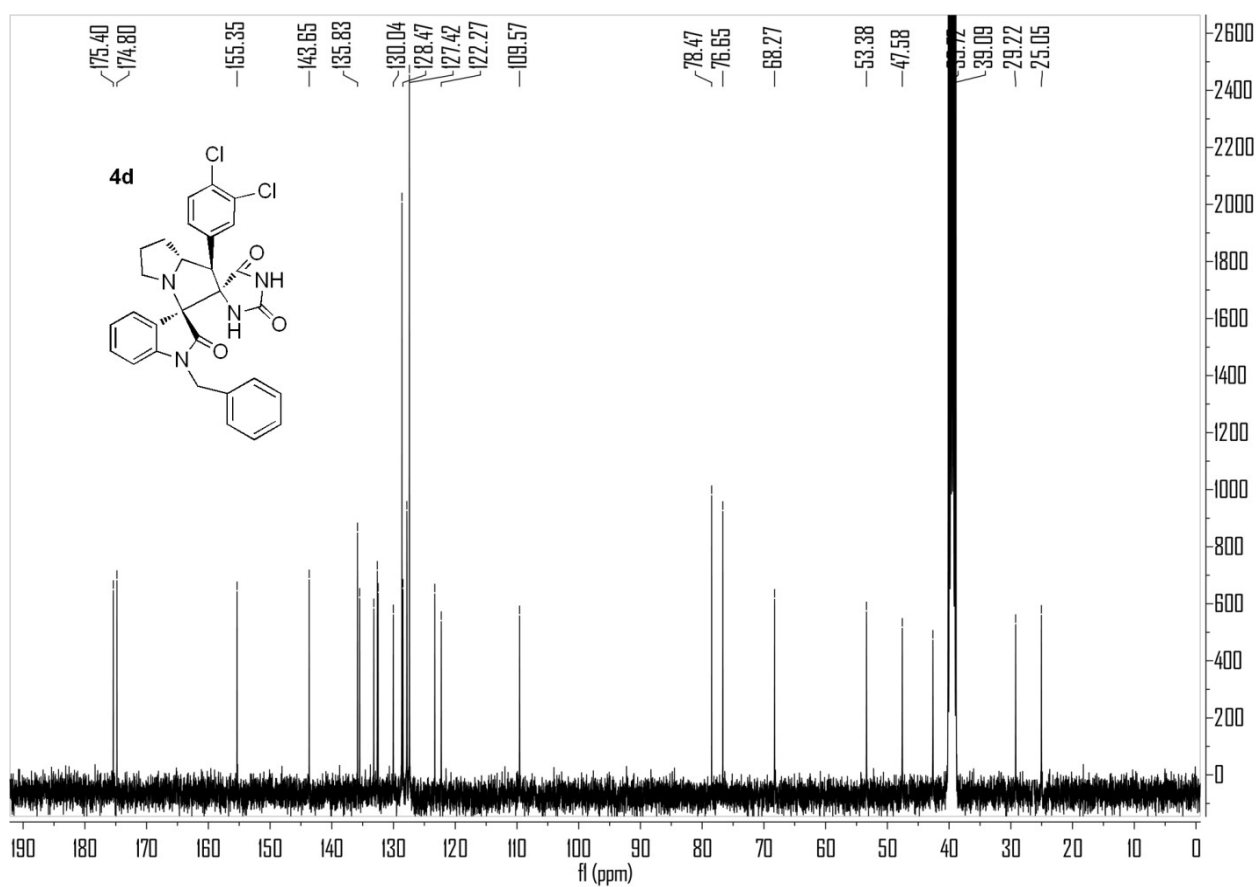

Figure S12. HRMS of Compound 4d.

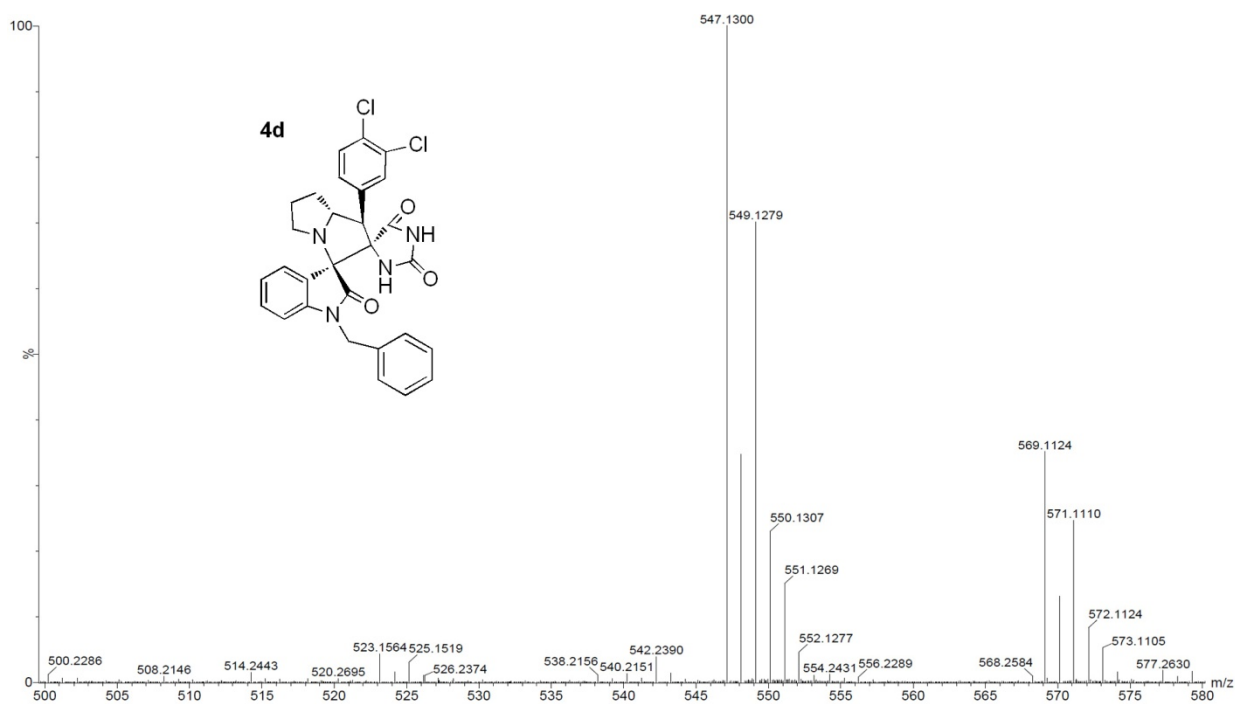

Figure S13.  $^1\text{H}$ -NMR of Compound 4e.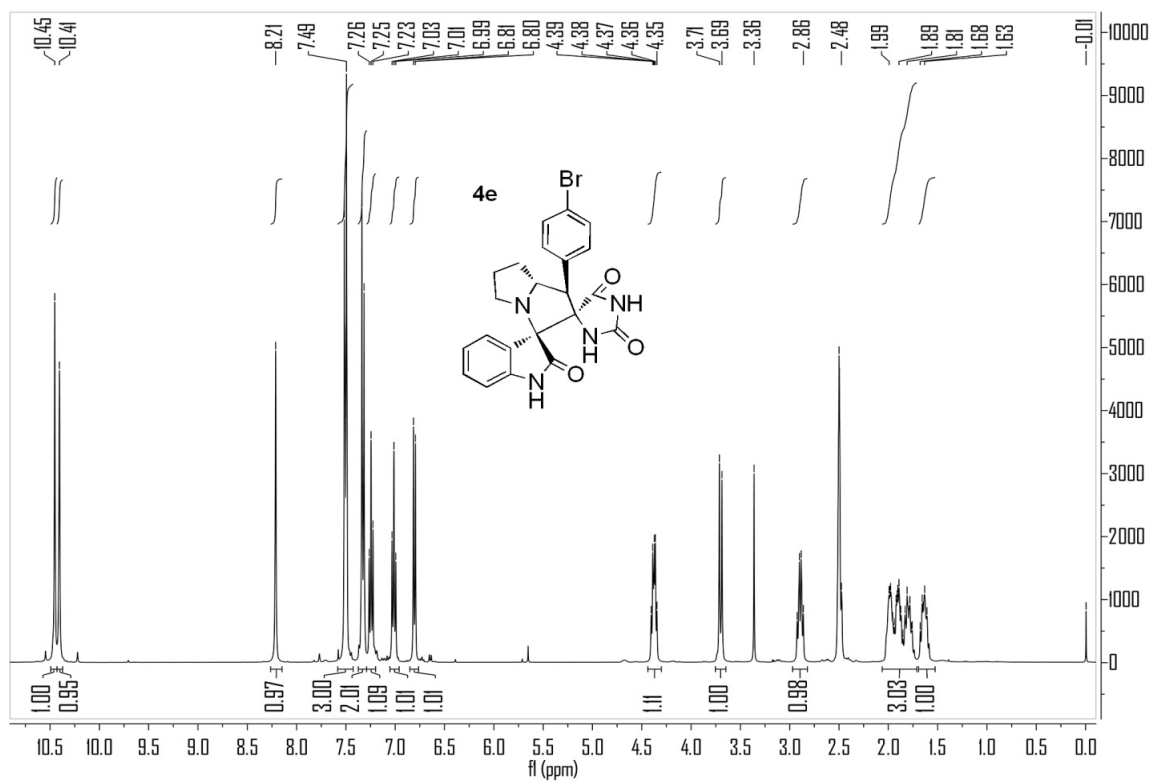Figure S14.  $^{13}\text{C}$ -NMR of Compound 4e.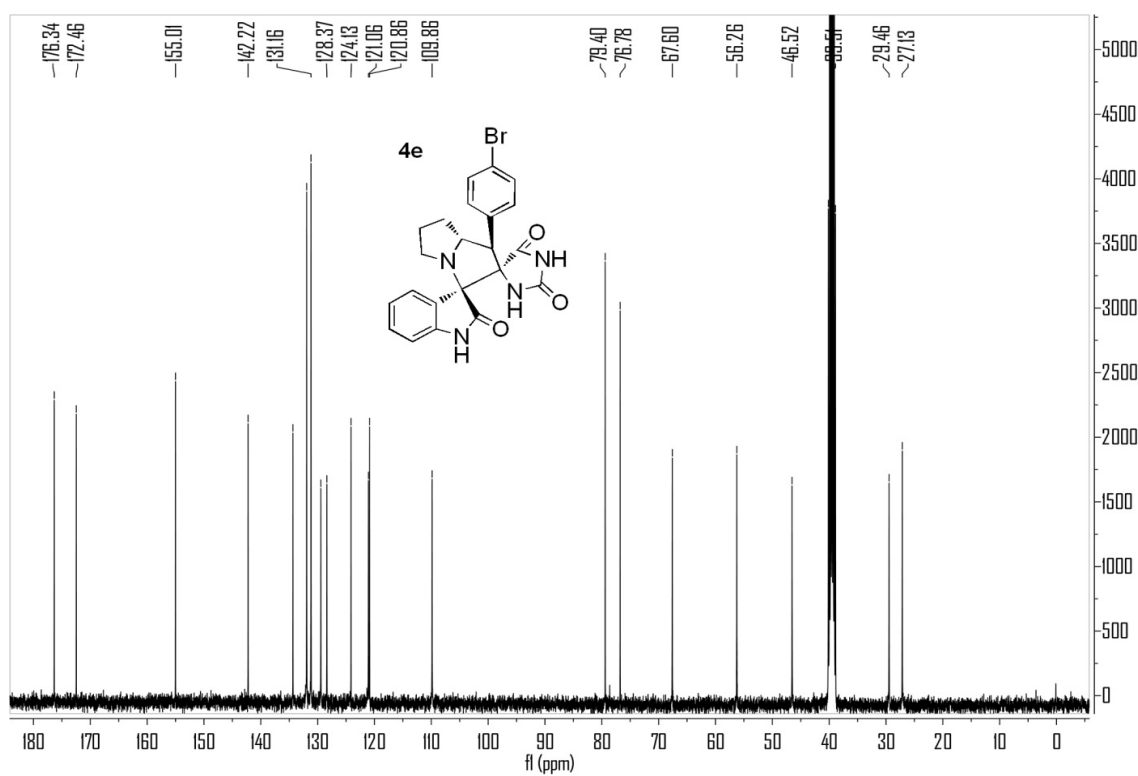

Figure S15. HRMS of Compound 4e.

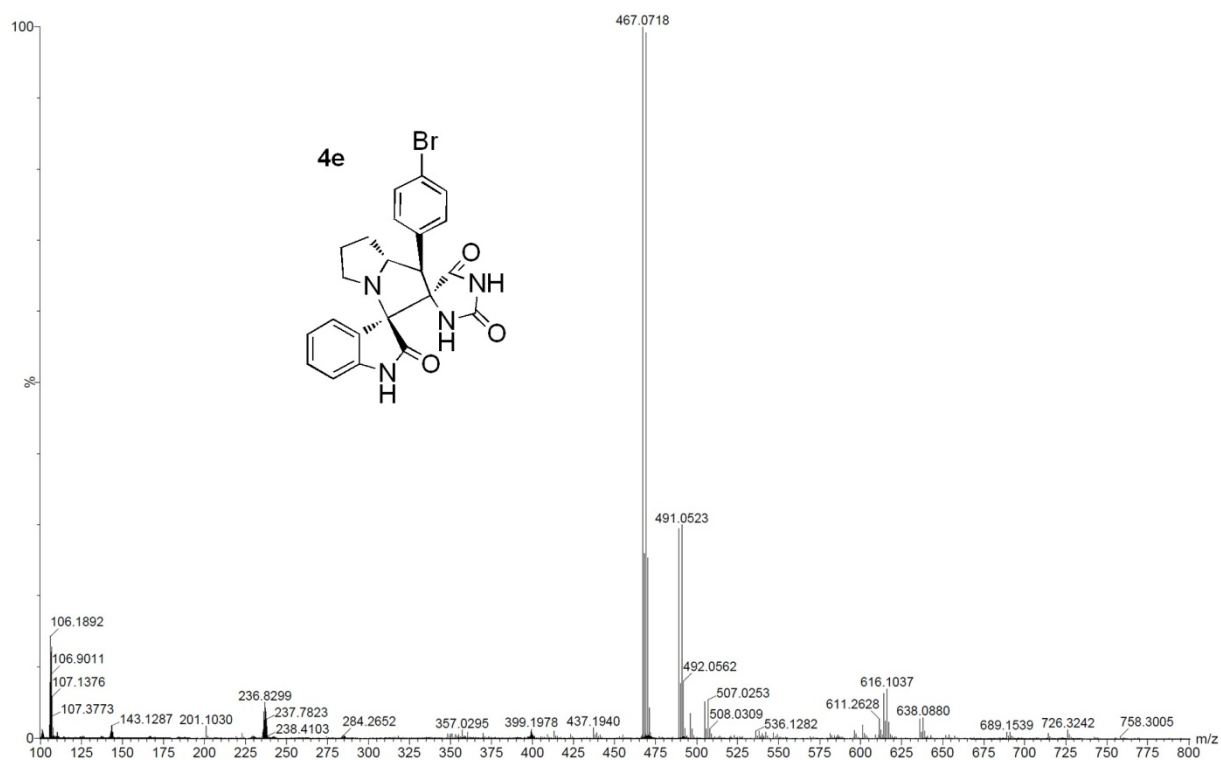Figure S16.  $^1\text{H}$ -NMR of Compound 4f.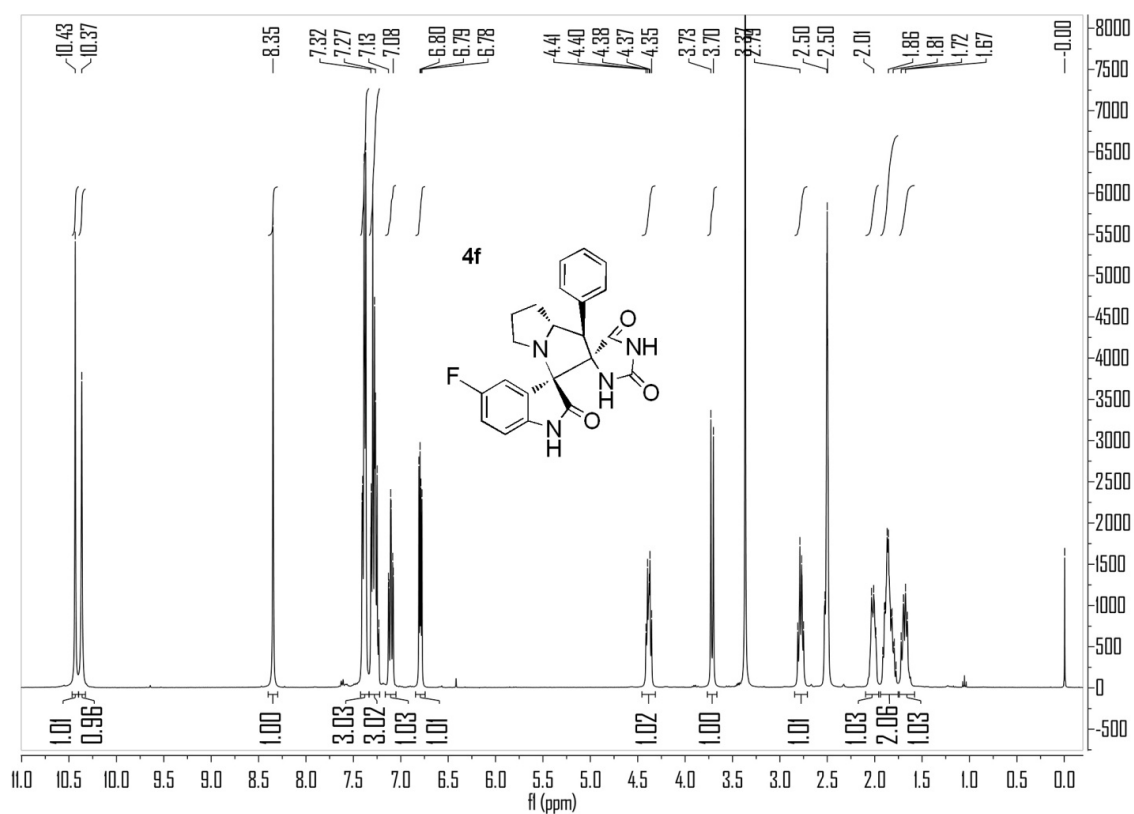

Figure S17.  $^{13}\text{C}$ -NMR of Compound 4f.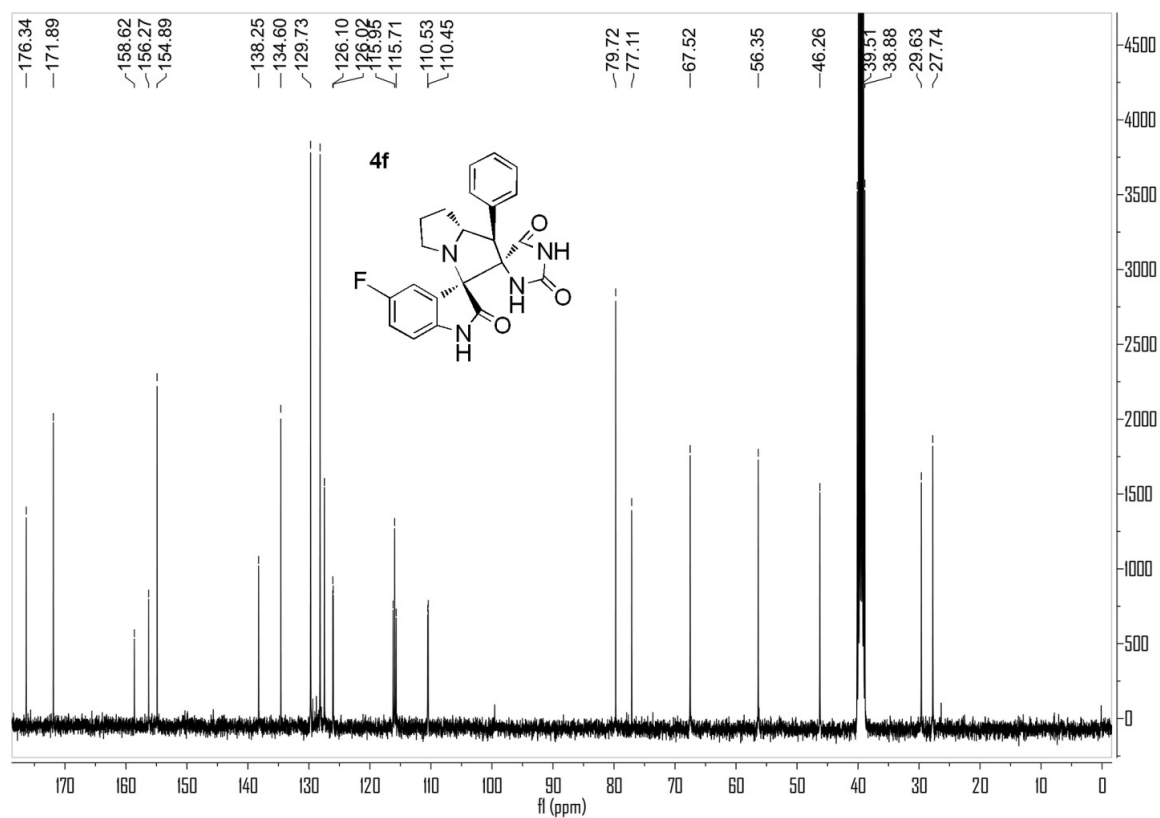

Figure S18. HRMS of Compound 4f.

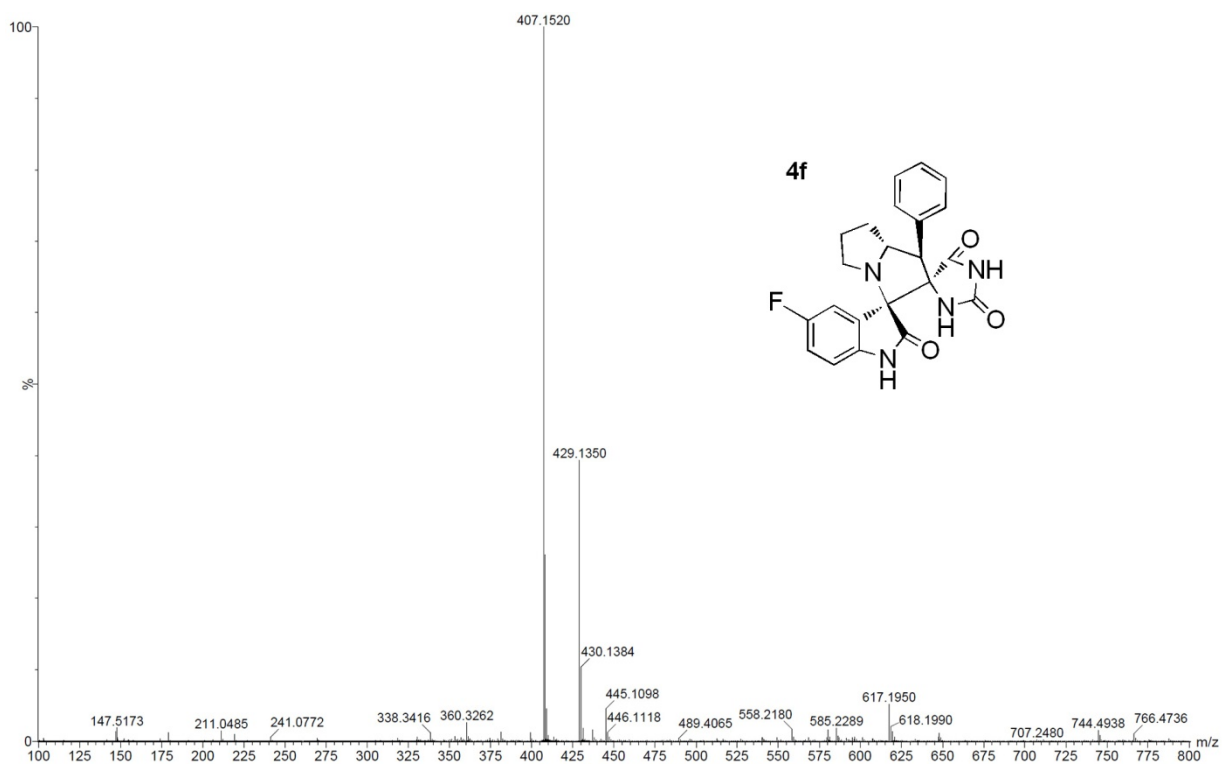

Figure S19.  $^1\text{H}$ -NMR of Compound 4g.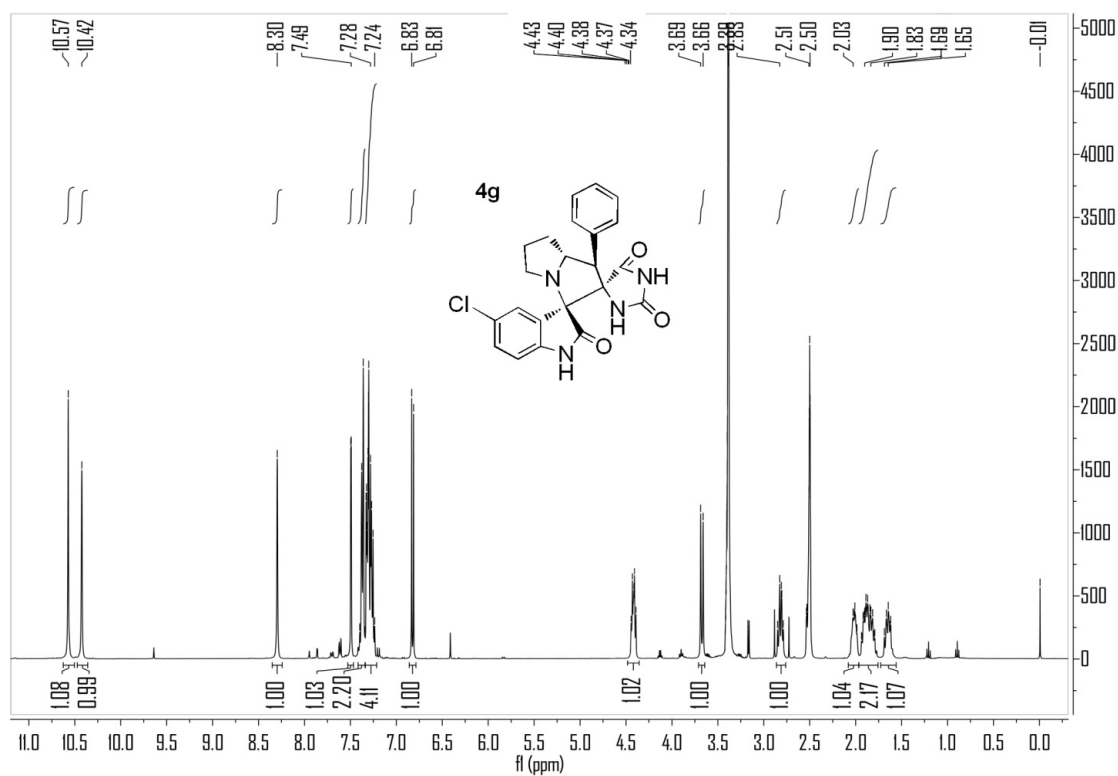Figure S20.  $^{13}\text{C}$ -NMR of Compound 4g.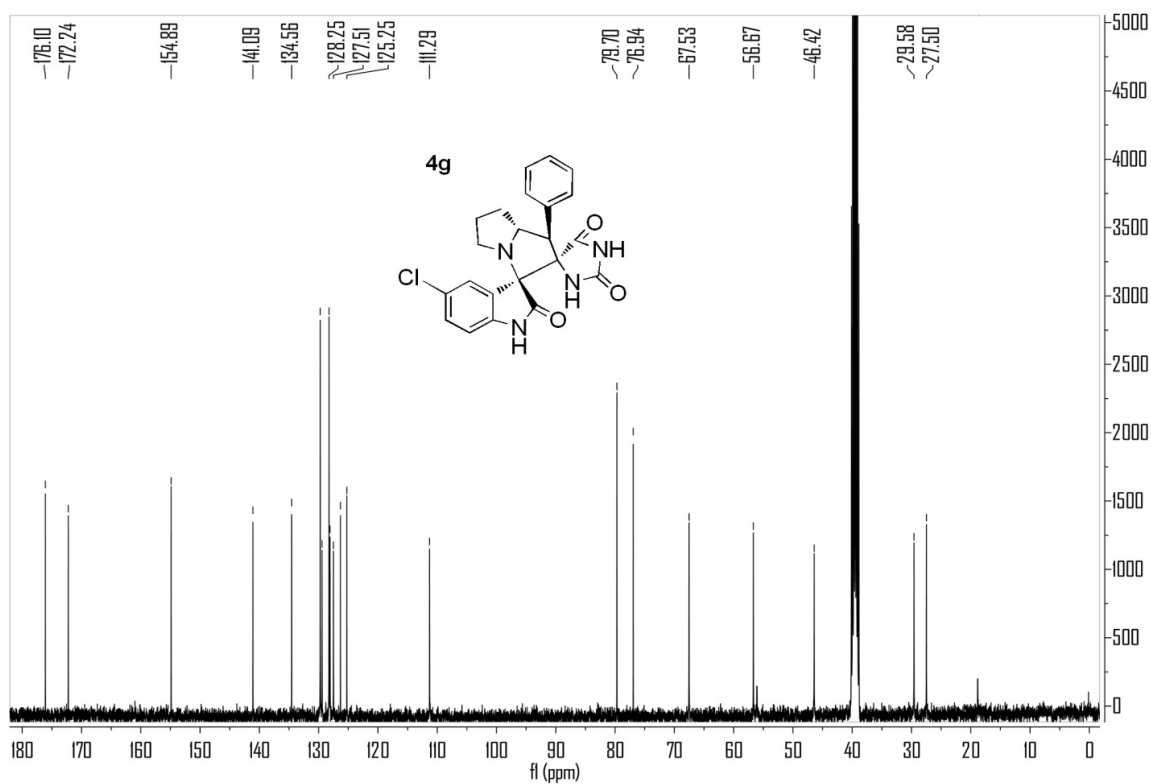

Figure S21. HRMS of Compound 4g.

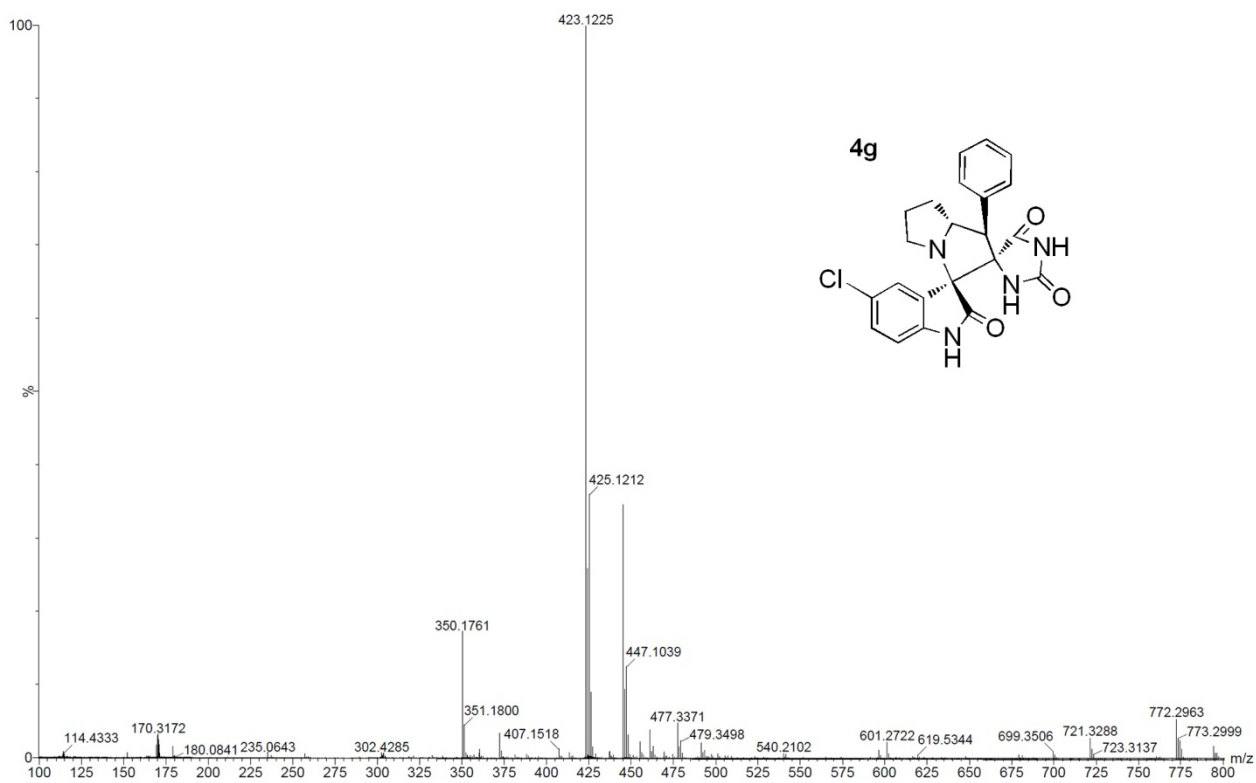Figure S22.  $^1\text{H}$ -NMR of Compound 4h.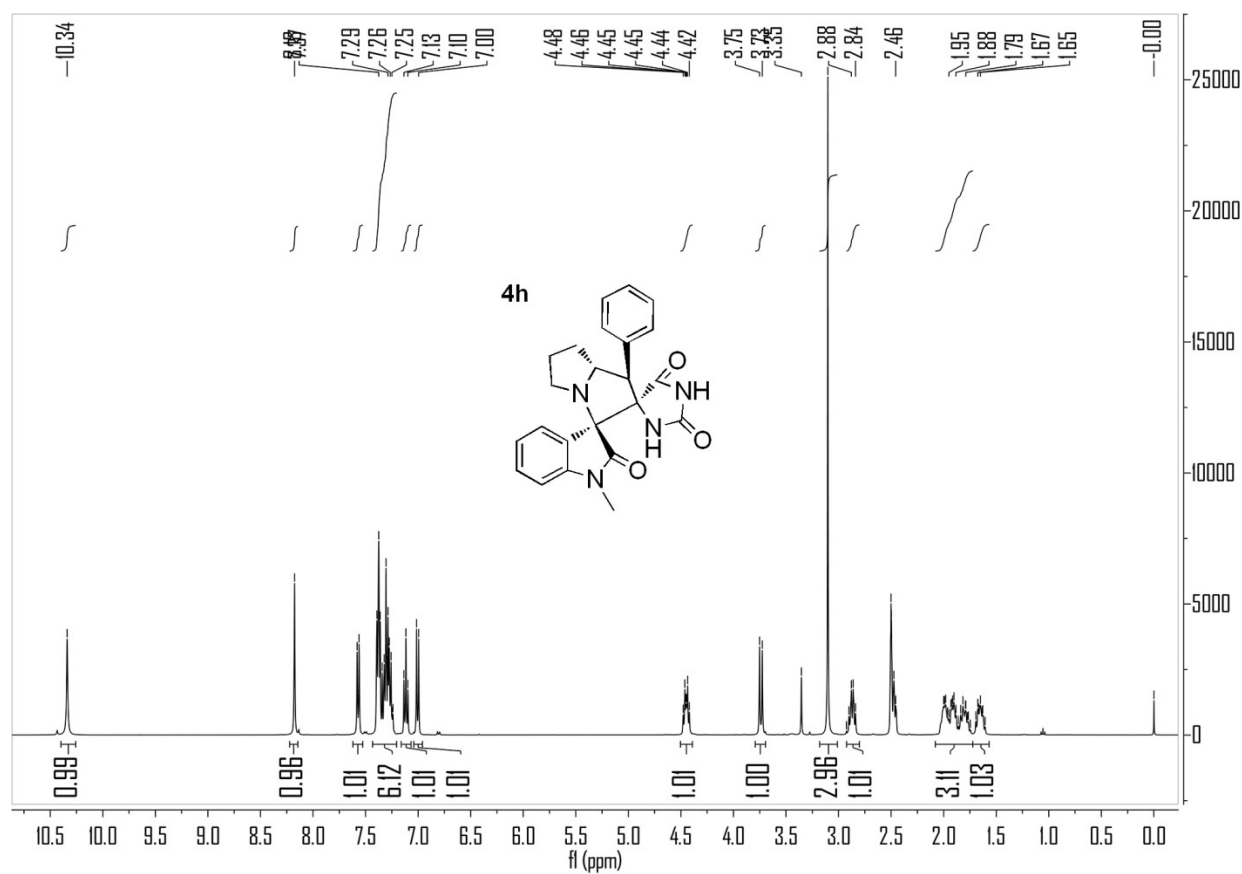

**Figure S23.**  $^{13}\text{C}$ -NMR of Compound **4h**.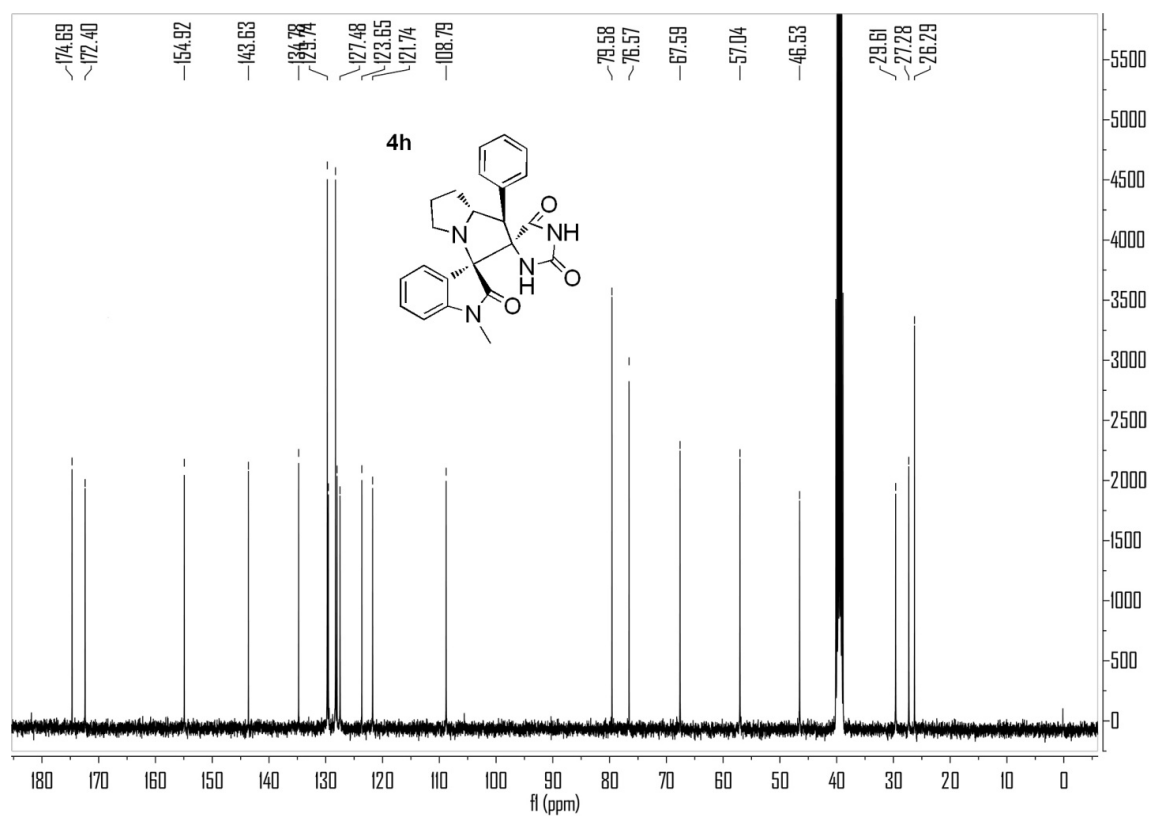**Figure S24.** HRMS of Compound **4h**.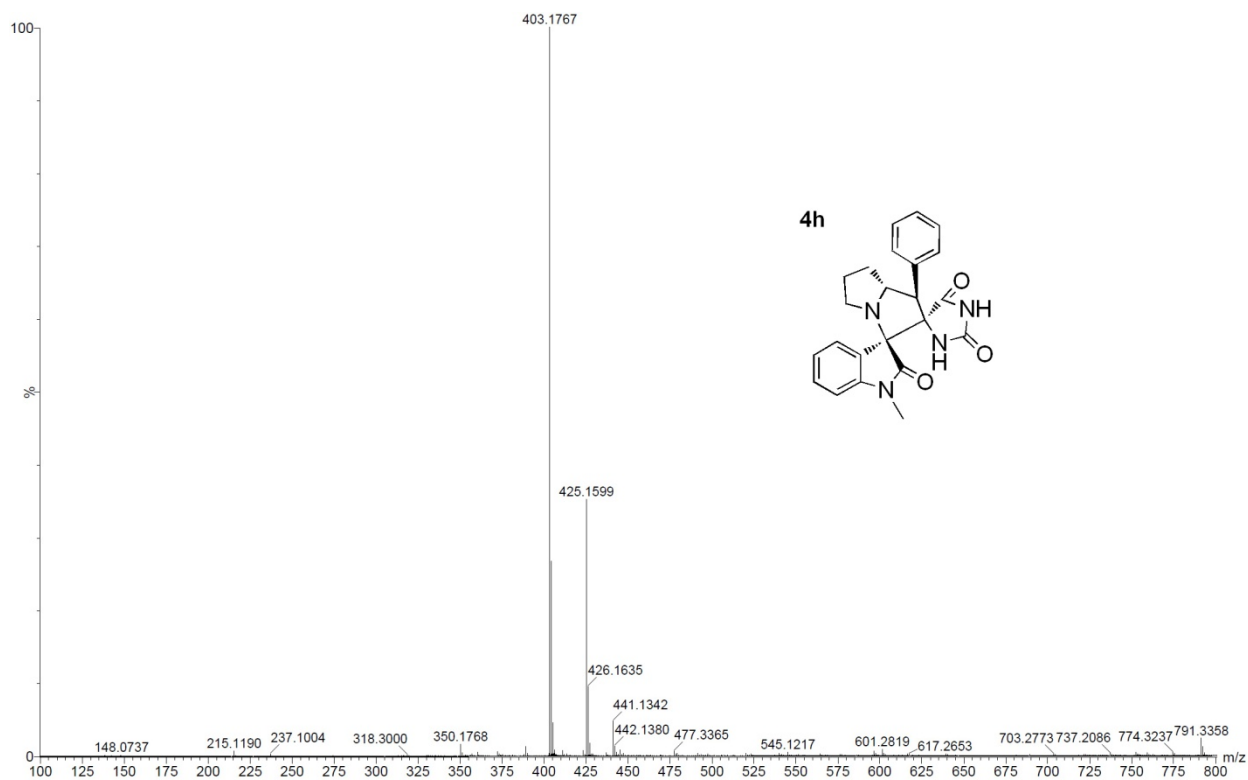

Figure S25.  $^1\text{H}$ -NMR of Compound 4i.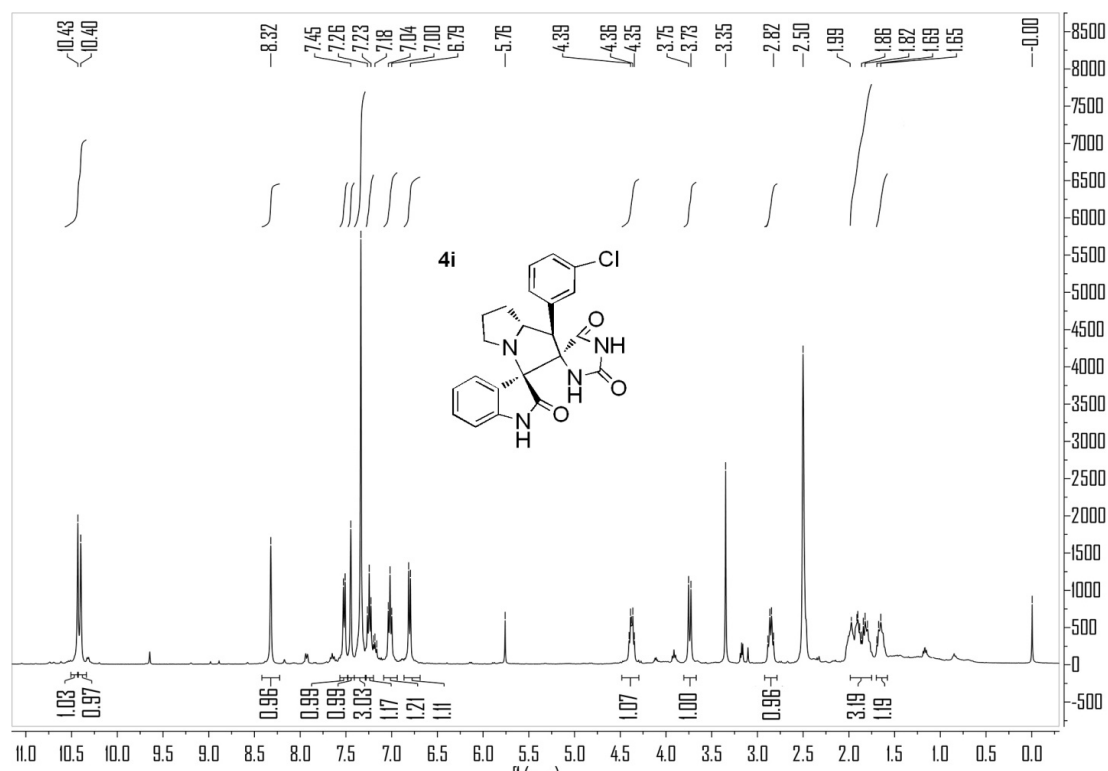Figure S26.  $^{13}\text{C}$ -NMR of Compound 4h.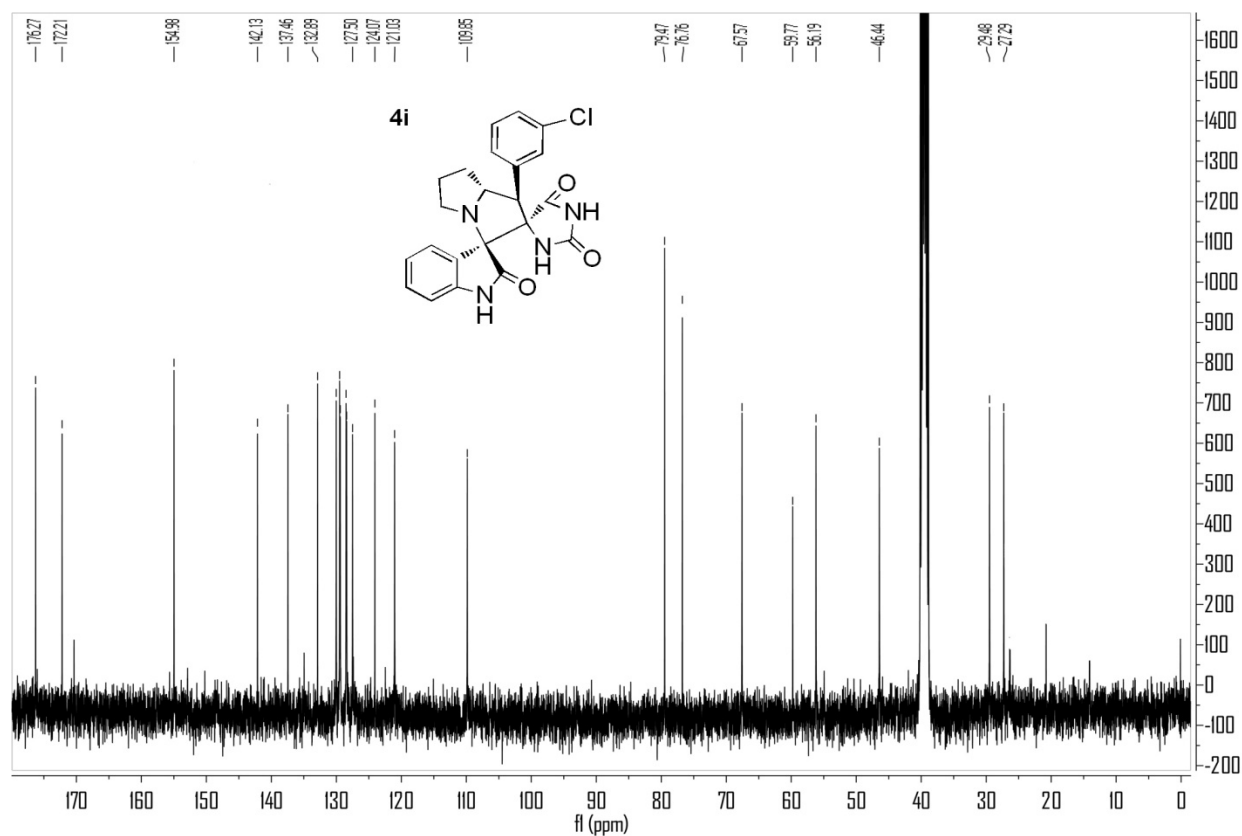

Figure S27. HRMS of Compound 4i.

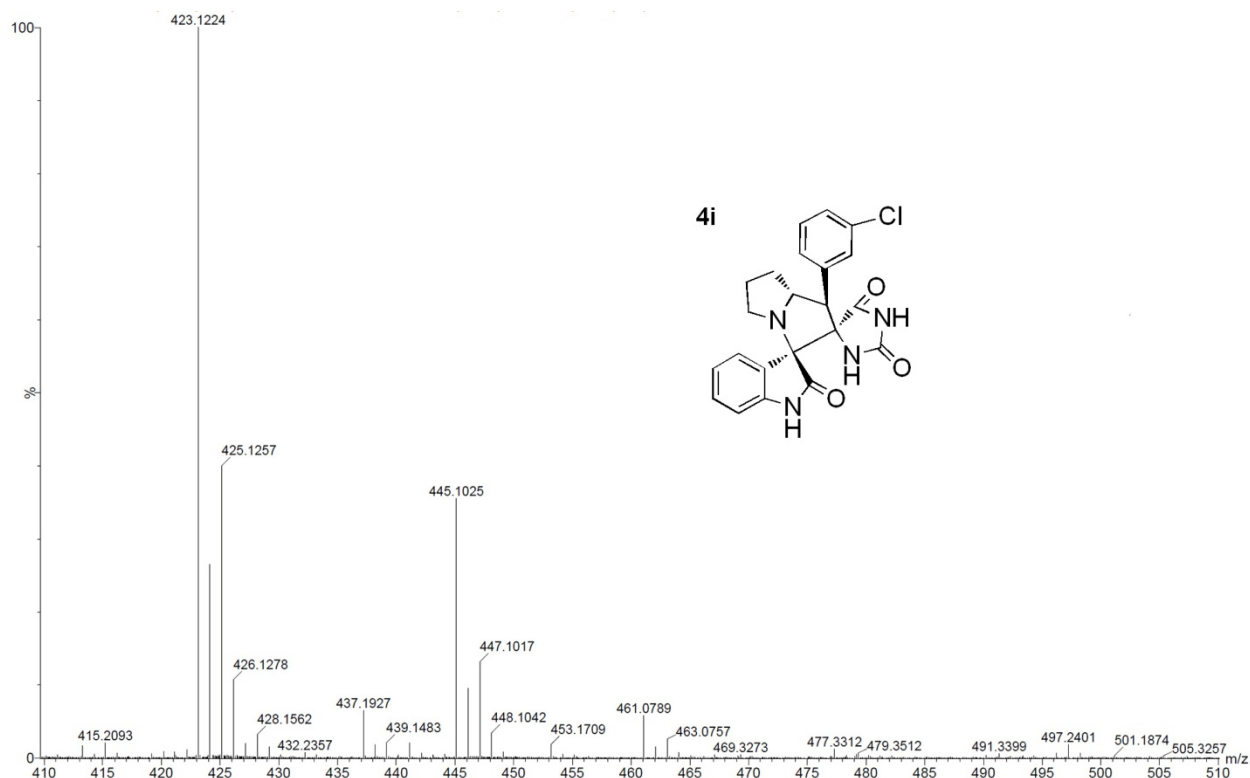Figure S28.  $^1\text{H}$ -NMR of Compound 4j.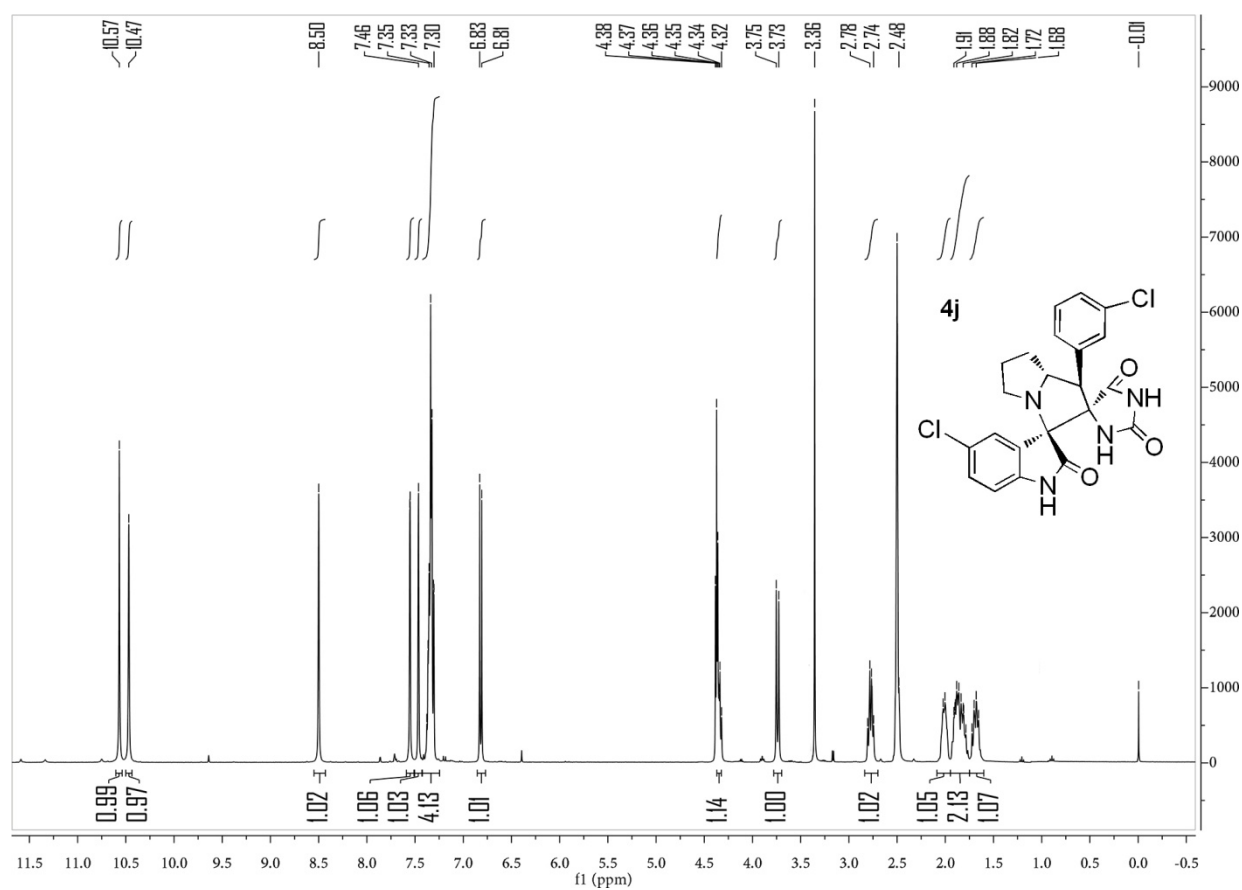

Figure S29.  $^{13}\text{C}$ -NMR of Compound 4j.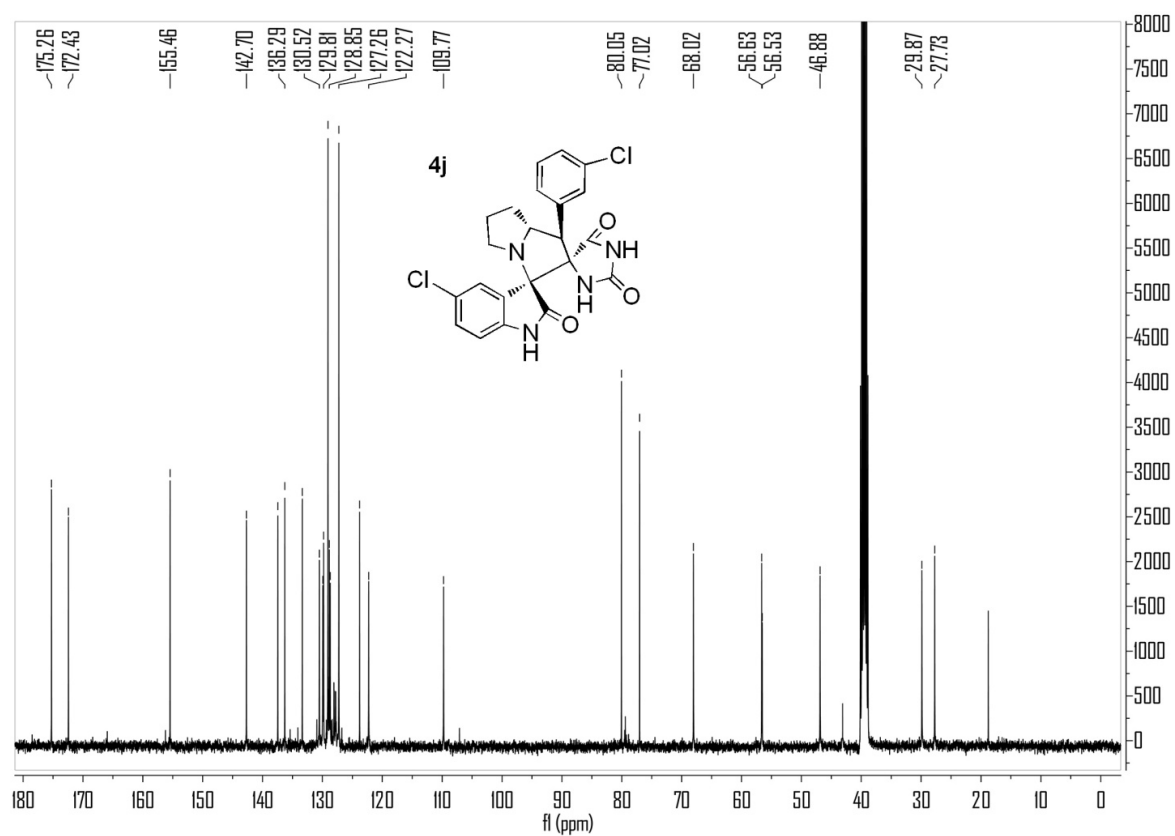

Figure S30. HRMS of Compound 4j.

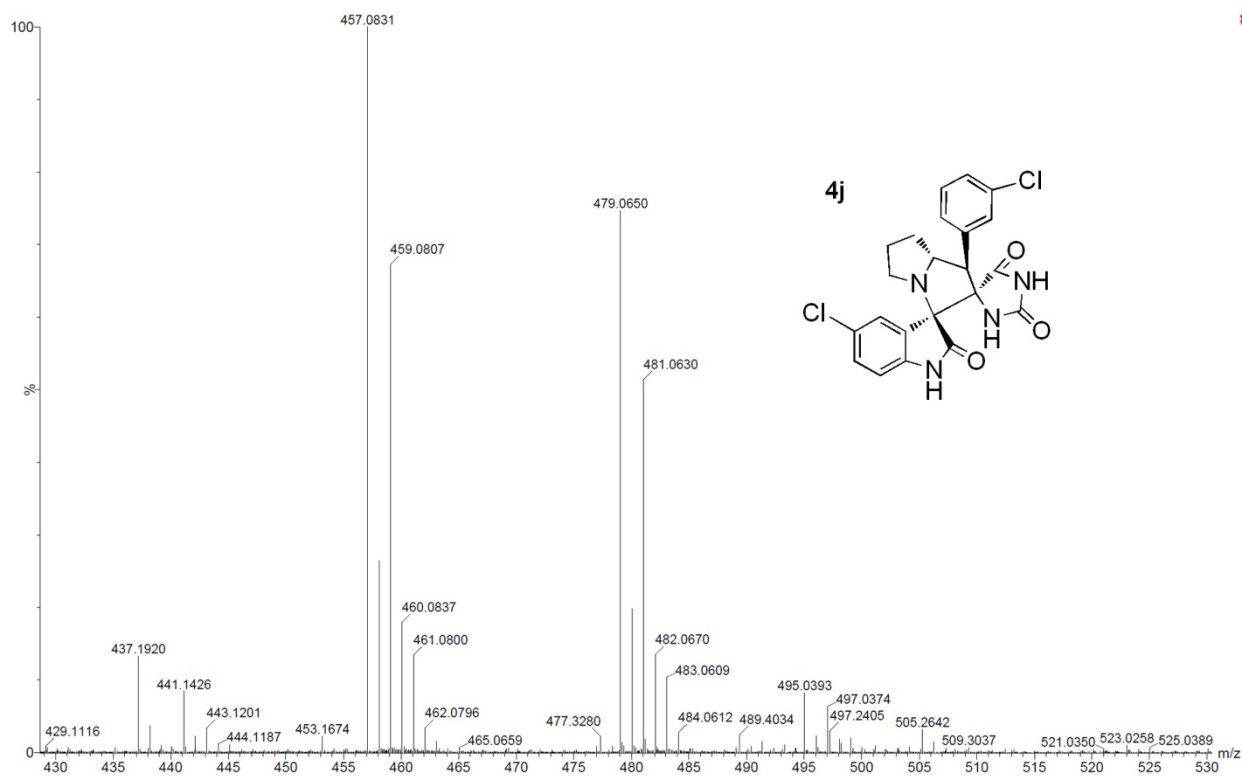

Figure S31.  $^1\text{H}$ -NMR of Compound 4k.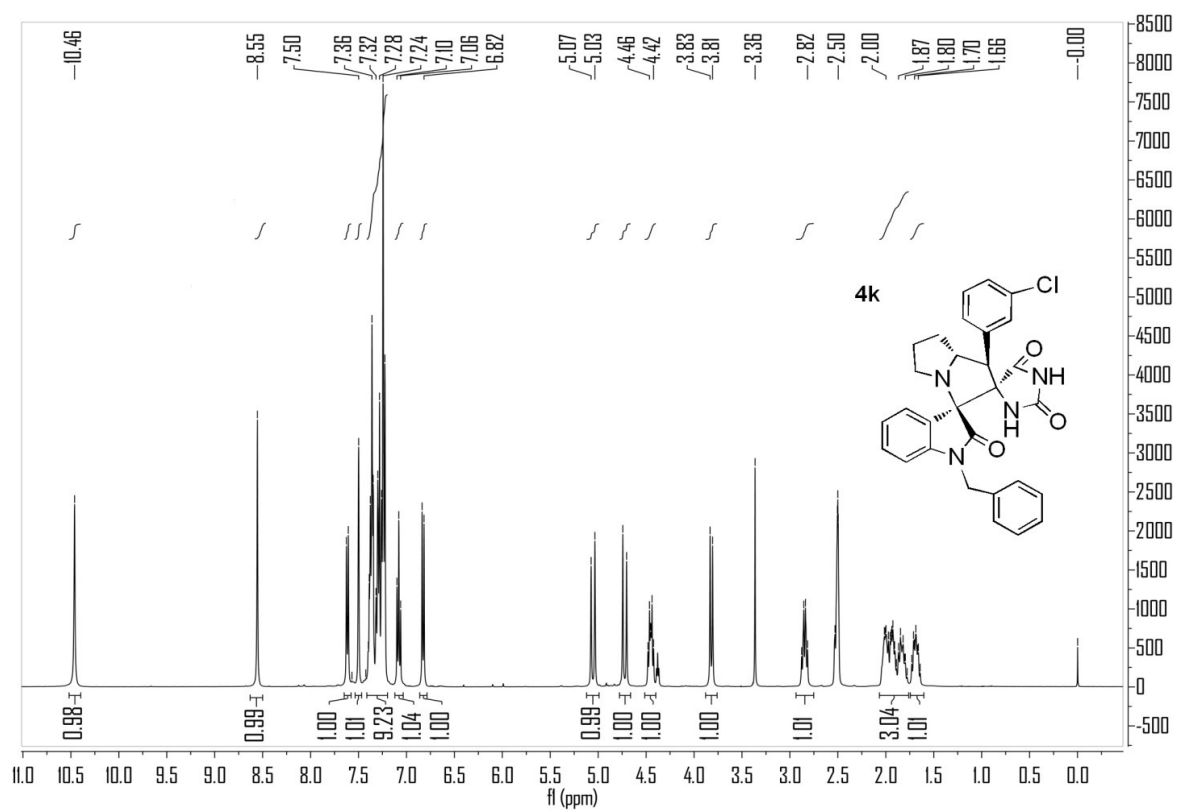Figure S32.  $^{13}\text{C}$ -NMR of Compound 4k.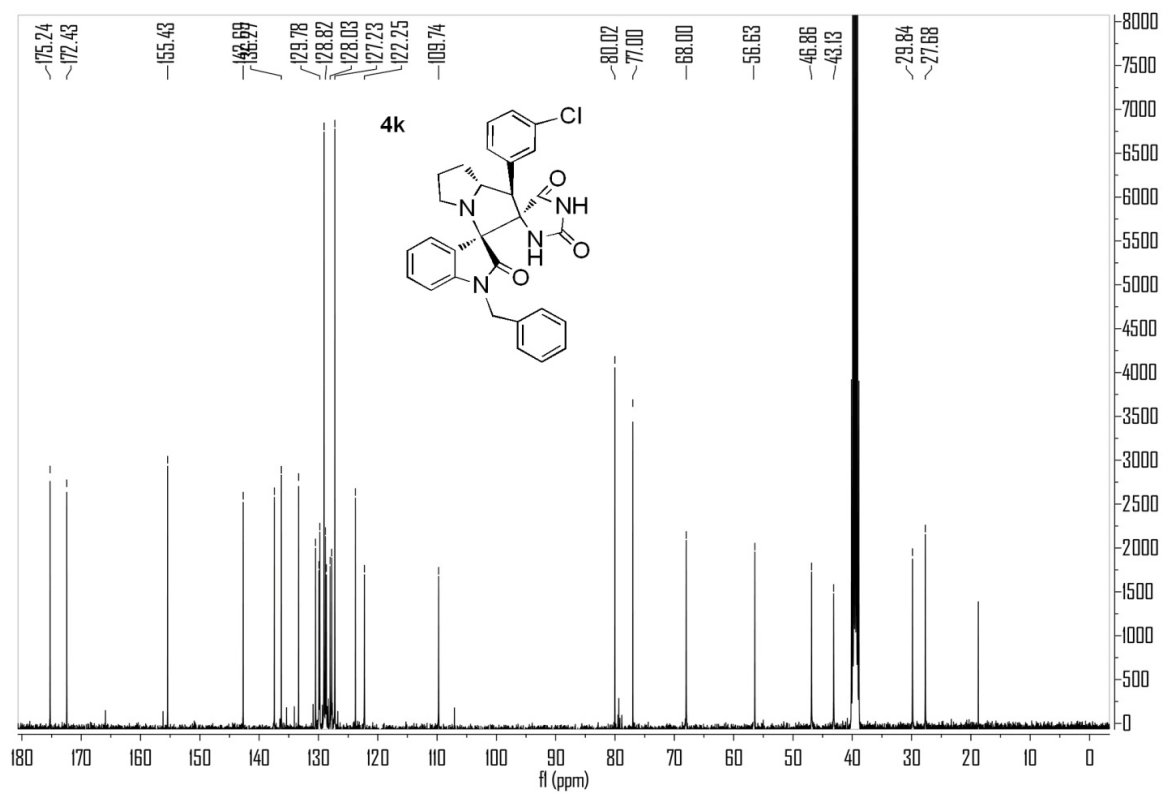

Figure S33. HRMS of Compound 4k.

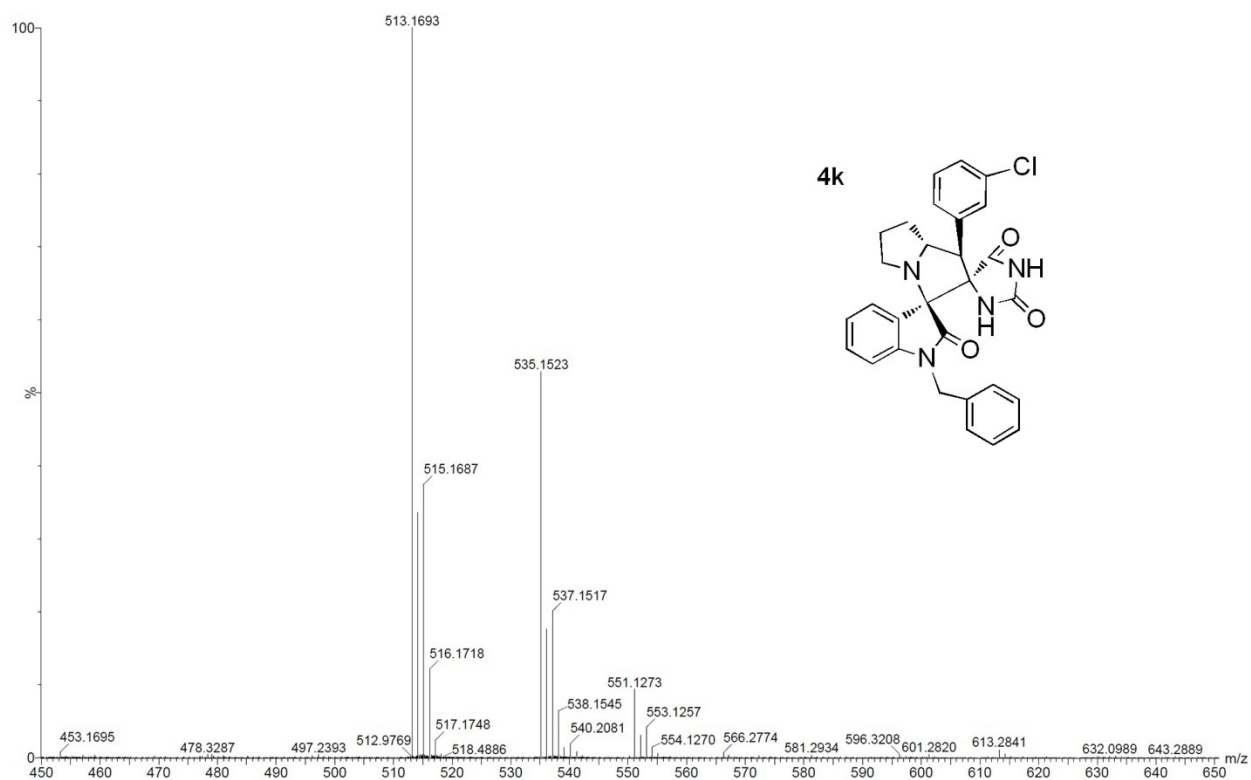Figure S34.  $^1\text{H}$ -NMR of Compound 4l.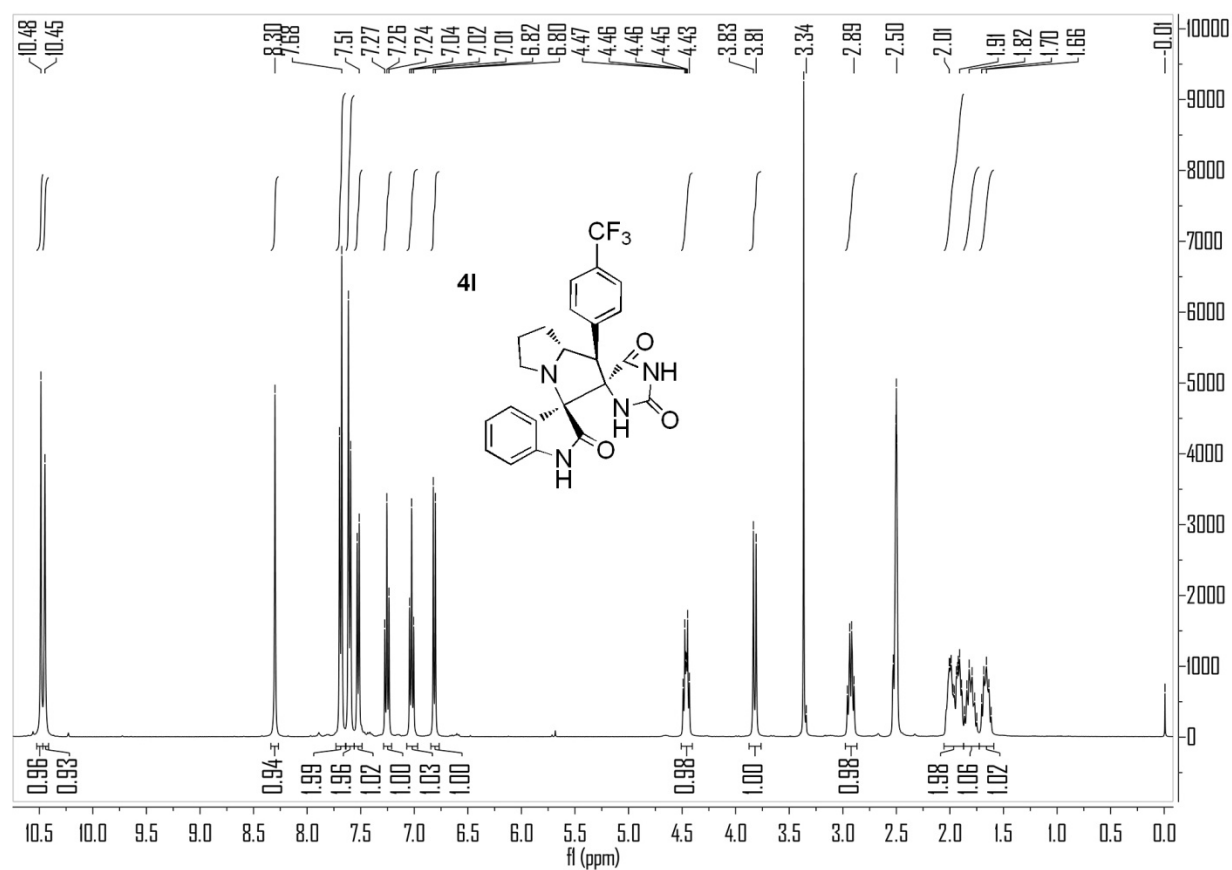

Figure S35.  $^{13}\text{C}$ -NMR of Compound 4I.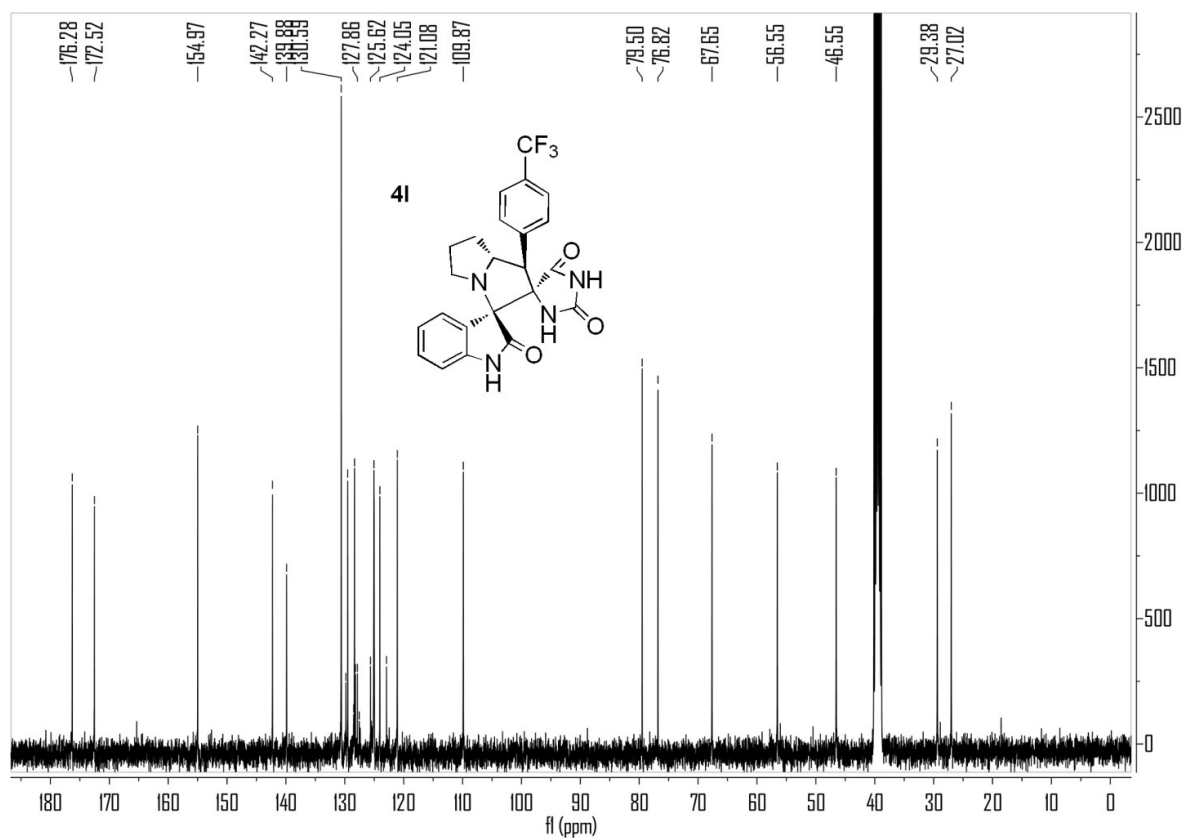

Figure S36. HRMS of Compound 4I.

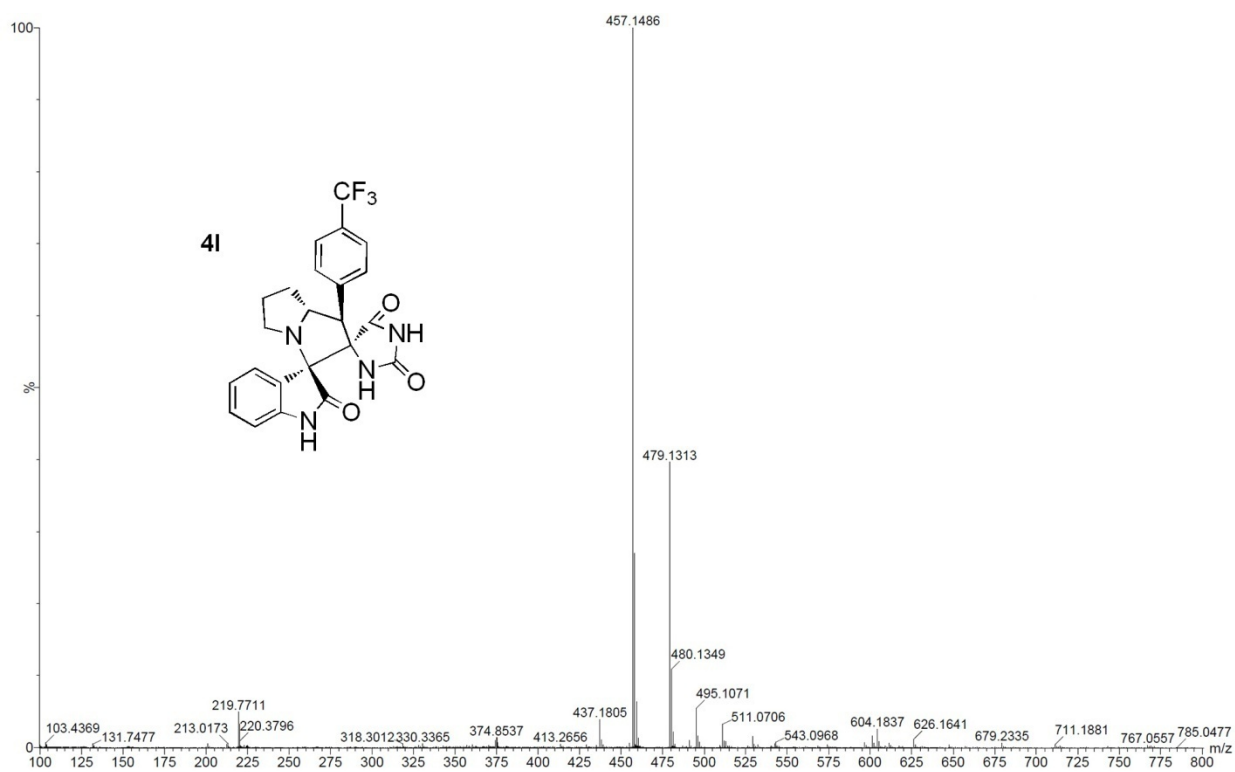

Figure S37.  $^1\text{H}$ -NMR of Compound 4m.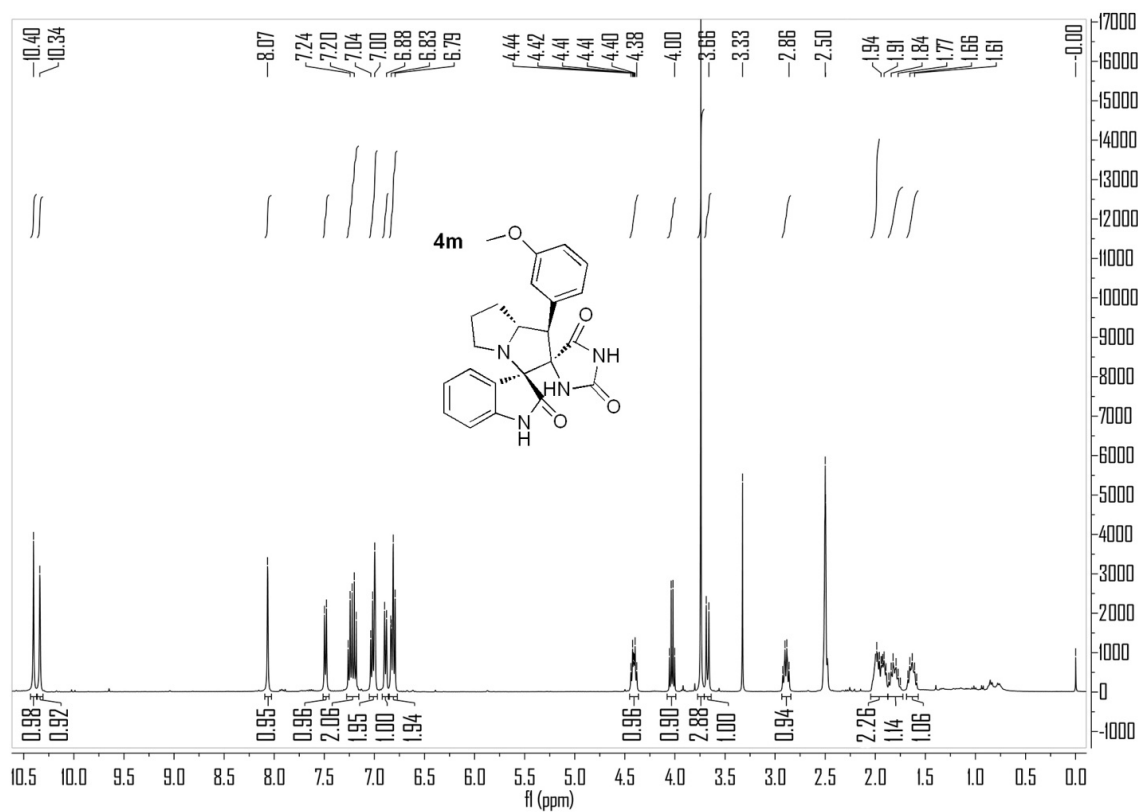Figure S38.  $^{13}\text{C}$ -NMR of Compound 4m.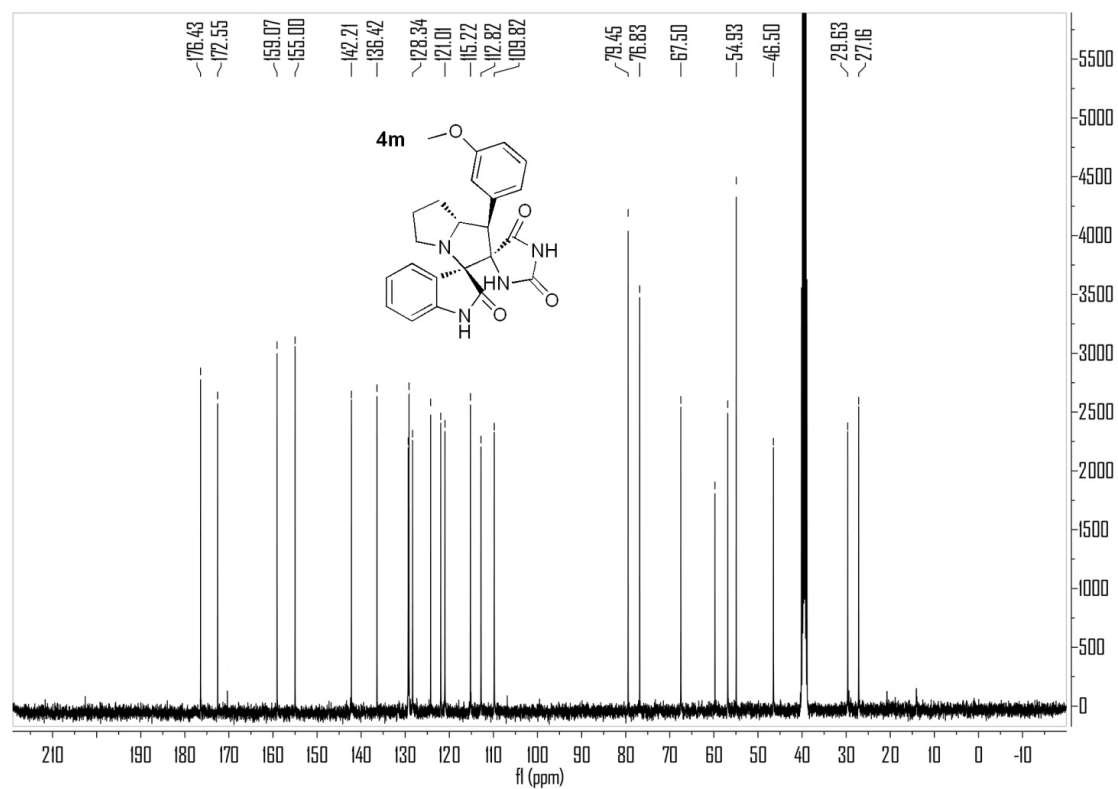

Figure S39. HRMS of Compound 4m.

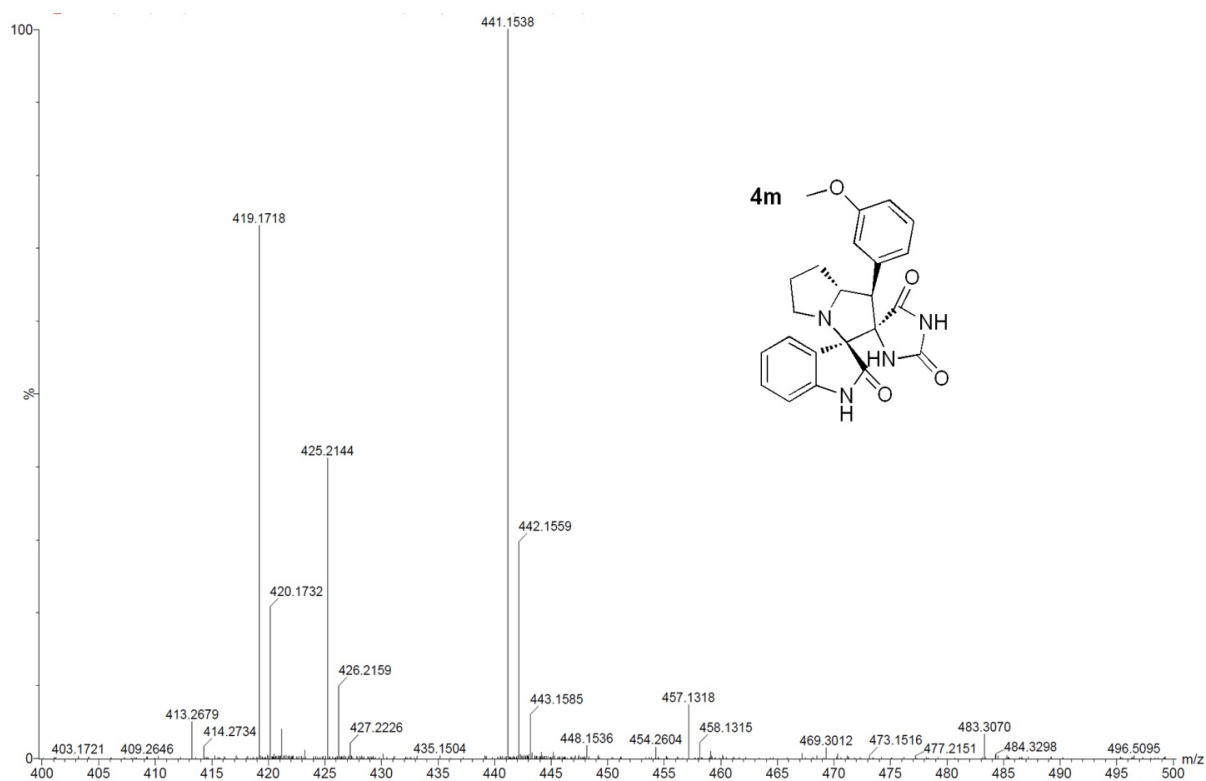Figure S40.  $^1\text{H}$ -NMR of Compound 4n.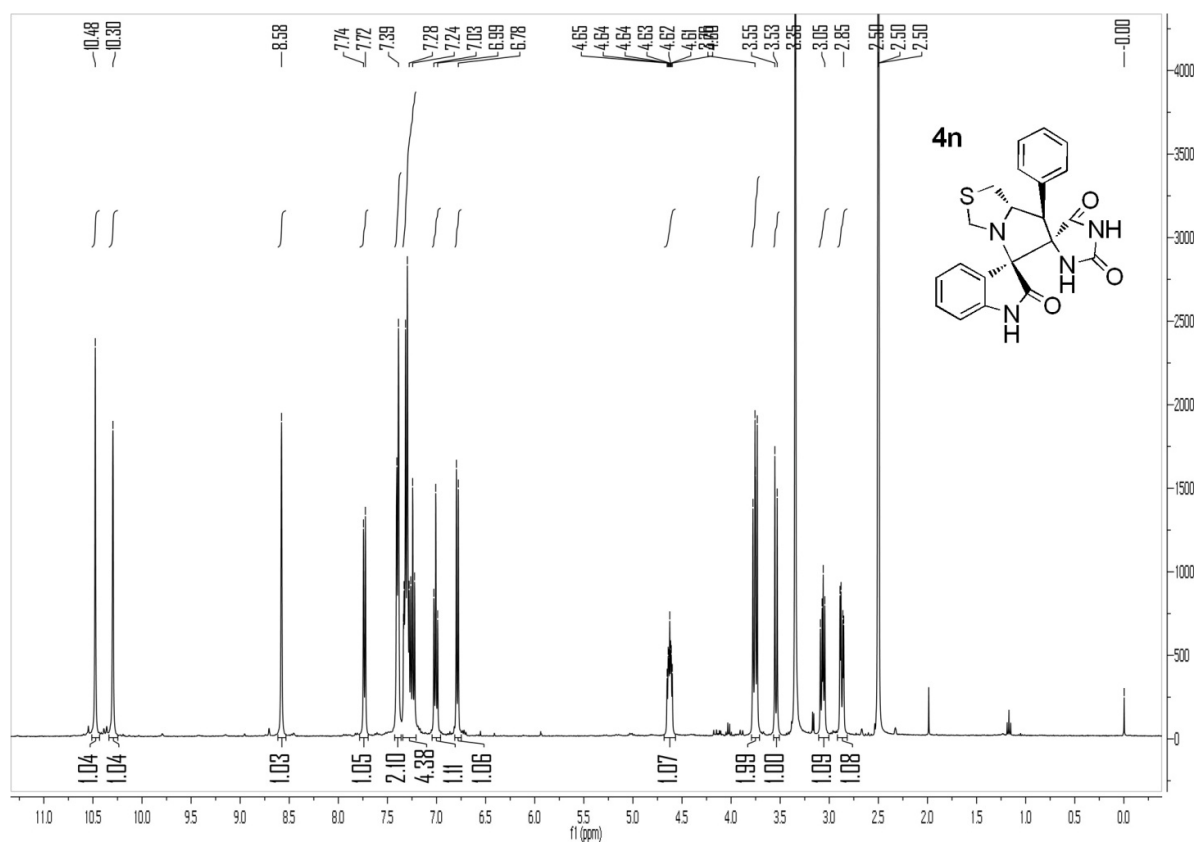

Figure S41.  $^{13}\text{C}$ -NMR of Compound 4n.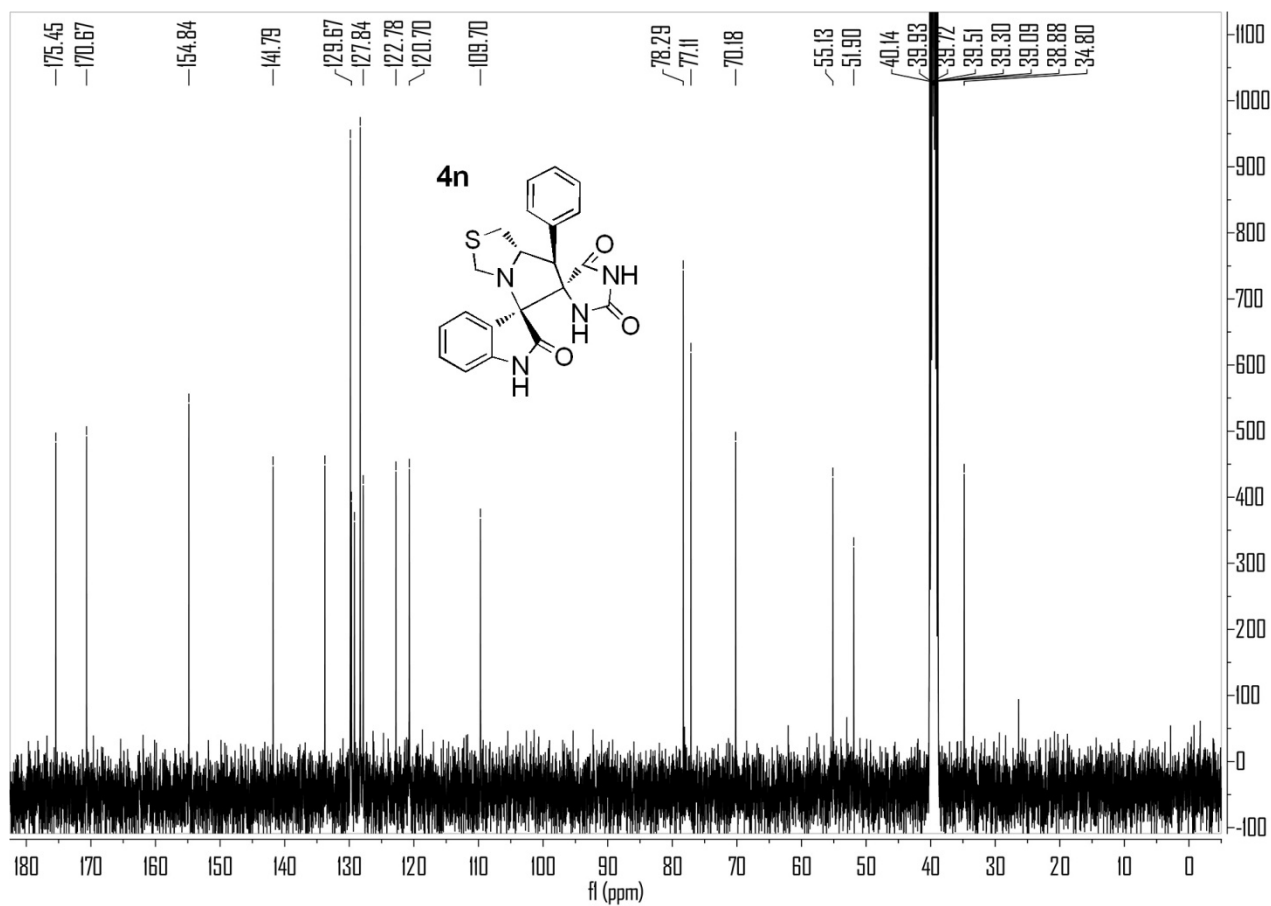

Figure S42. HRMS of Compound 4n.

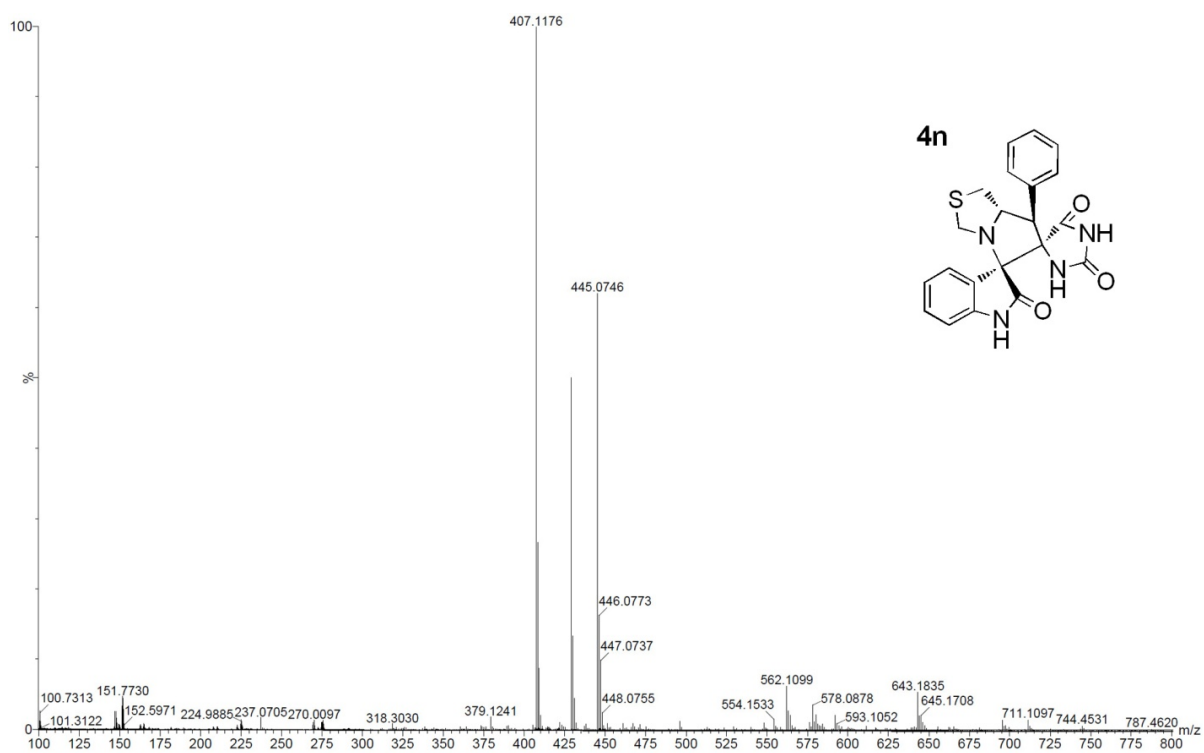

Supplement: Supplementary file 1 [file molecules-18-05142-s001.pdf]
